# Supplementary material for: Improved Synthesis of Glucosyl Esters
Source: Preprints.org preprint supplement (doi:10.20944/preprints201703.0203.v1), 2017-03-27

# Improved synthesis of glucosyl esters

*Yu Chen,<sup>1,2</sup> Huan Lu,<sup>2</sup> Yanyu Chen,<sup>1</sup> Wansheng Yu,<sup>2</sup> Hui Dai,<sup>2</sup> Xianhua Pan<sup>1,2,\*</sup>*

- 1) School of Perfume and Aroma Technology, Shanghai Institute of Technology,  
100 Haiquan Rd., Shanghai, 201418, P.R. China.
- 2) Shanghai Research Institute of Fragrance and Flavor Industry, 480 Nanning Rd.,  
Shanghai, 200232, P.R. China.

# Copies of $^1\text{H}$ NMR and $^{13}\text{C}$ NMR data

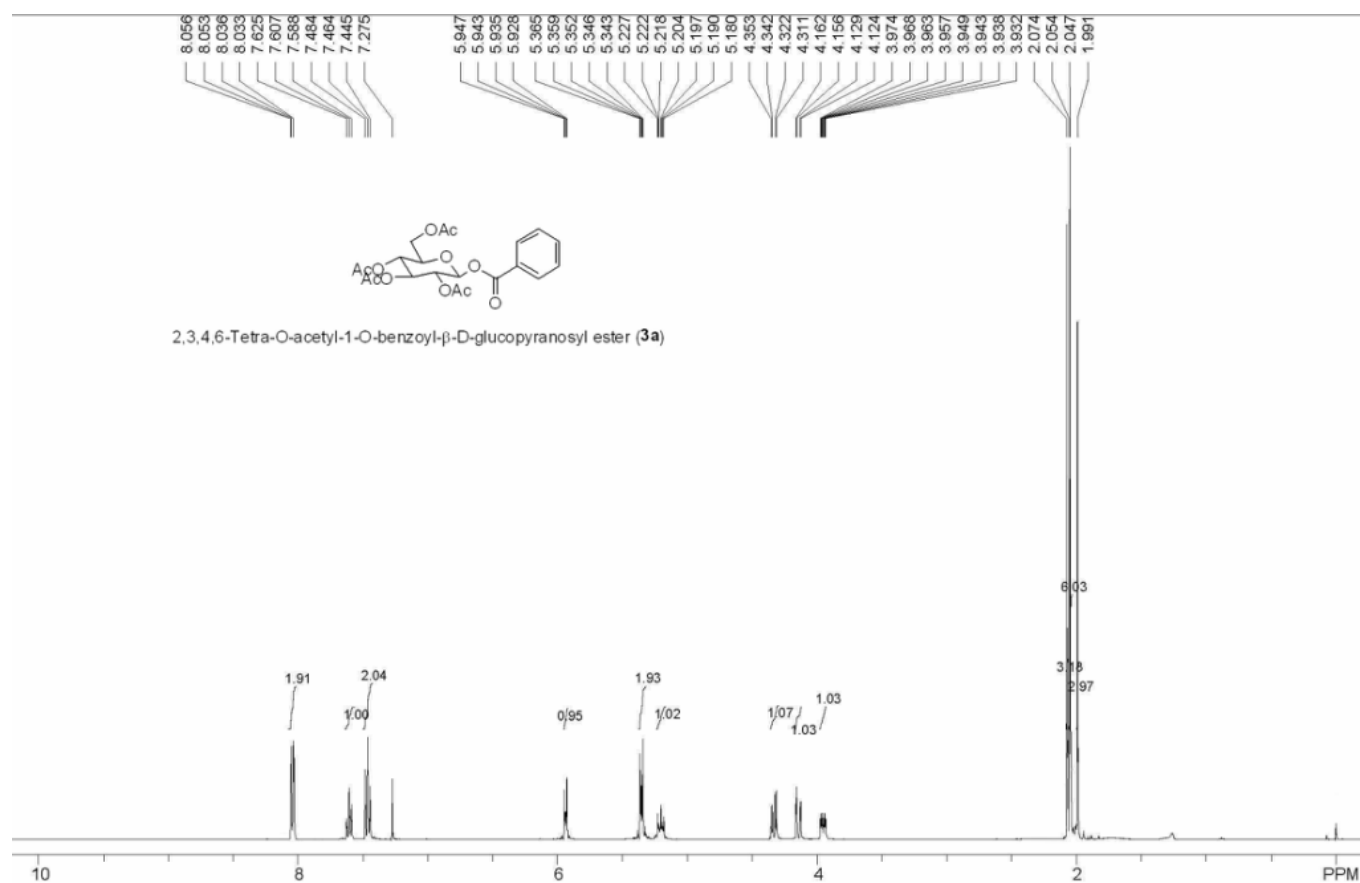

Figure S1.  $^1\text{H}$  NMR spectrum of compound 3a

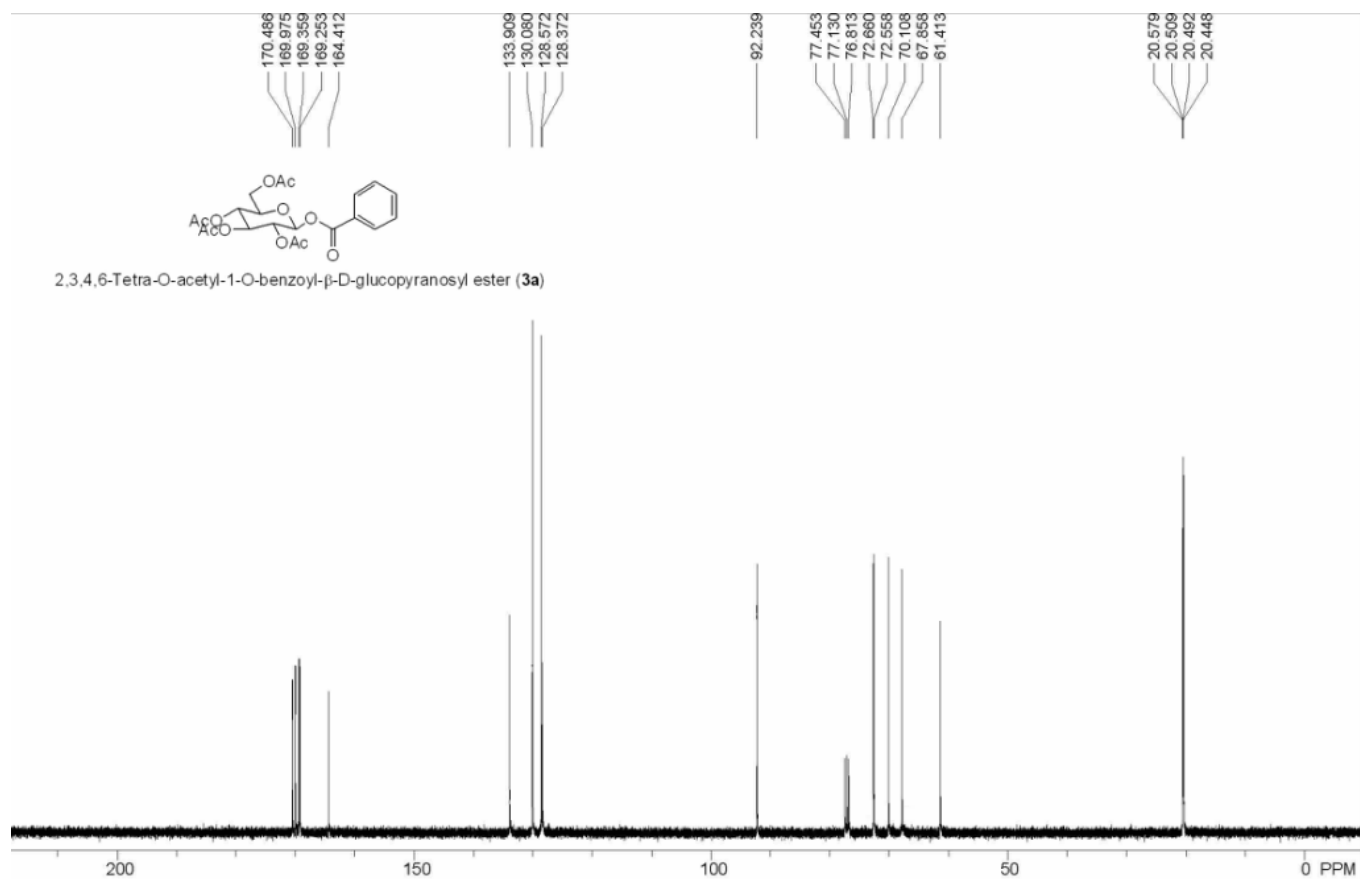

Figure S2.  $^{13}\text{C}$  NMR spectrum of compound 3a

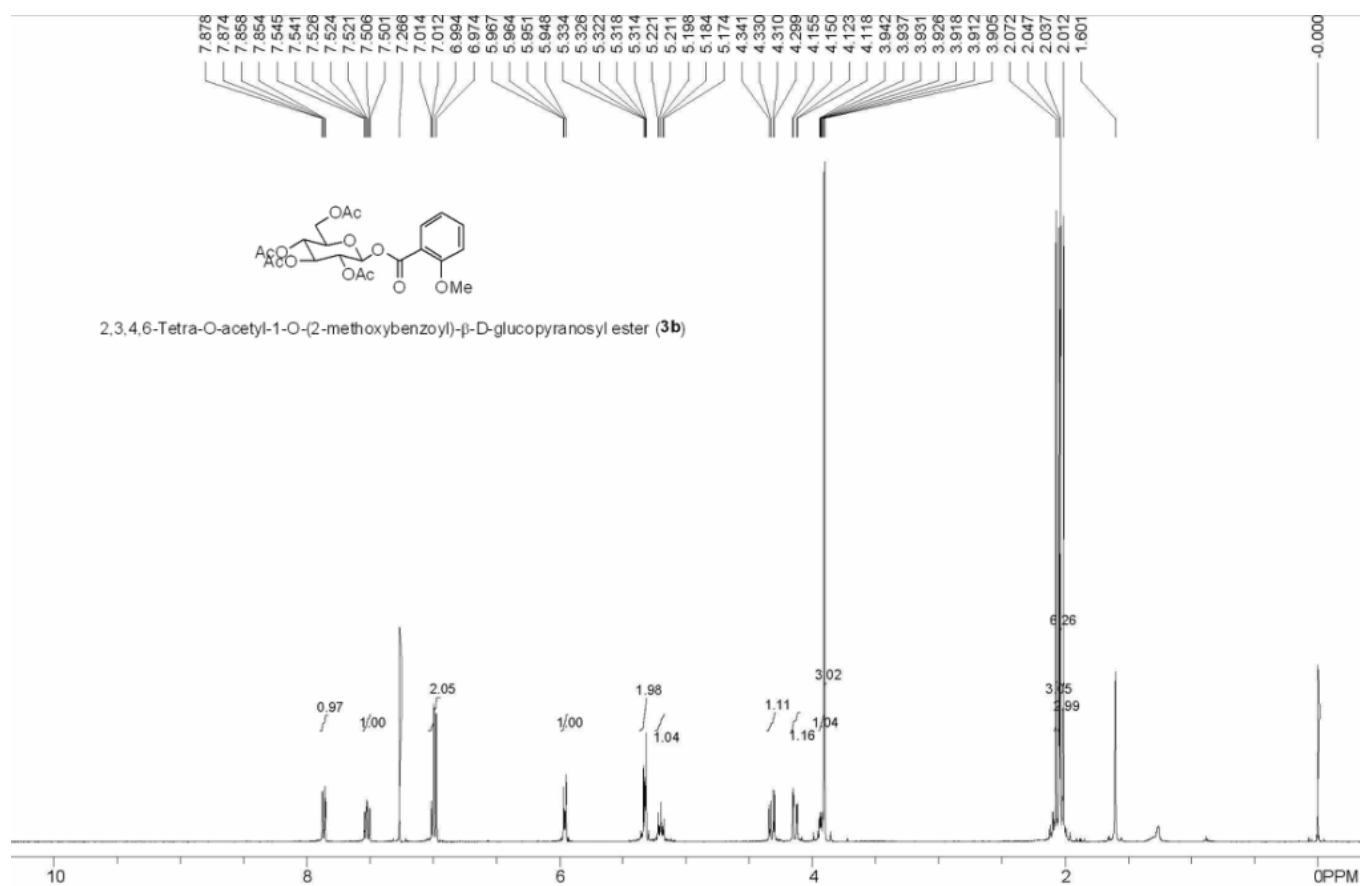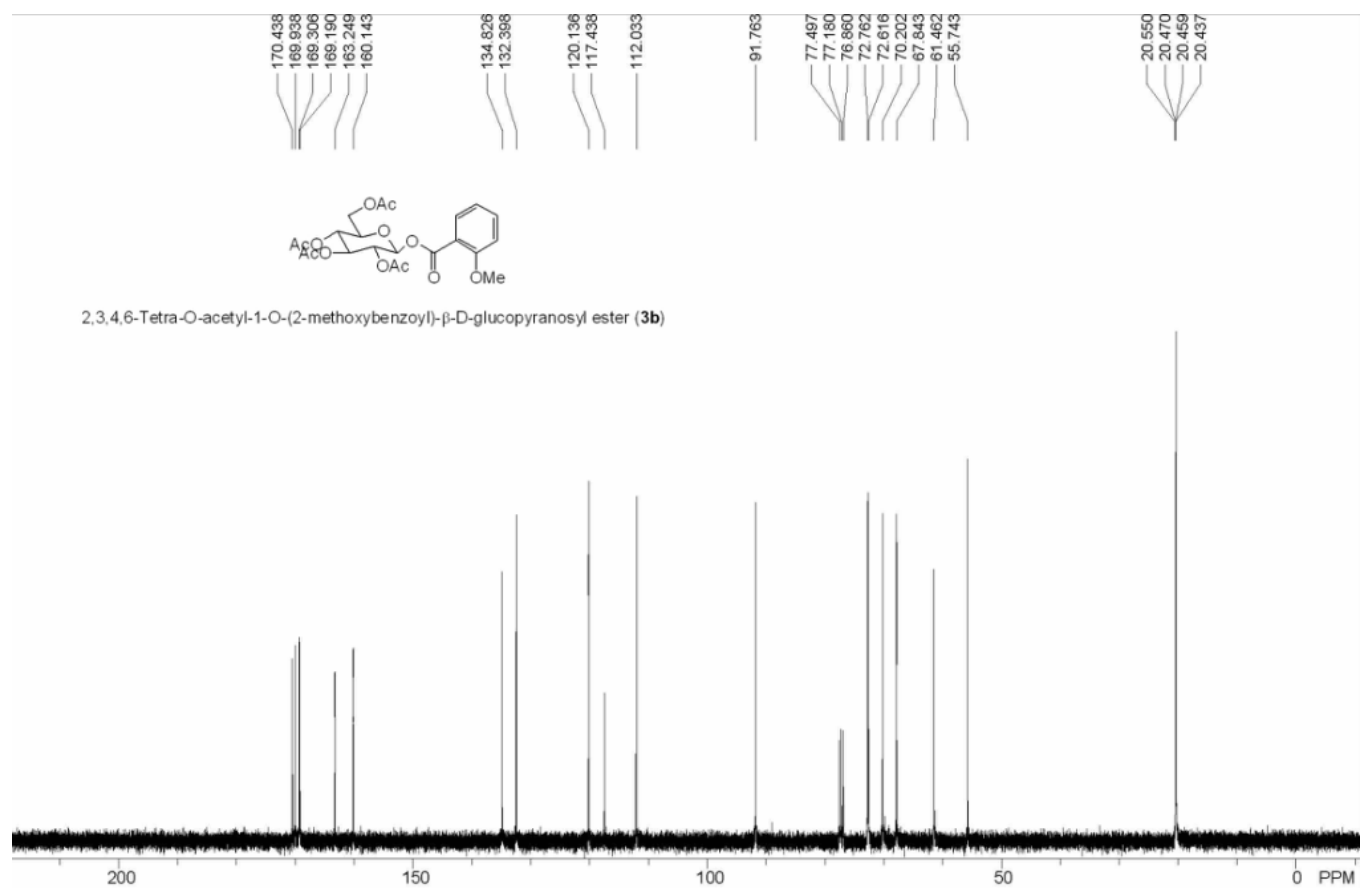

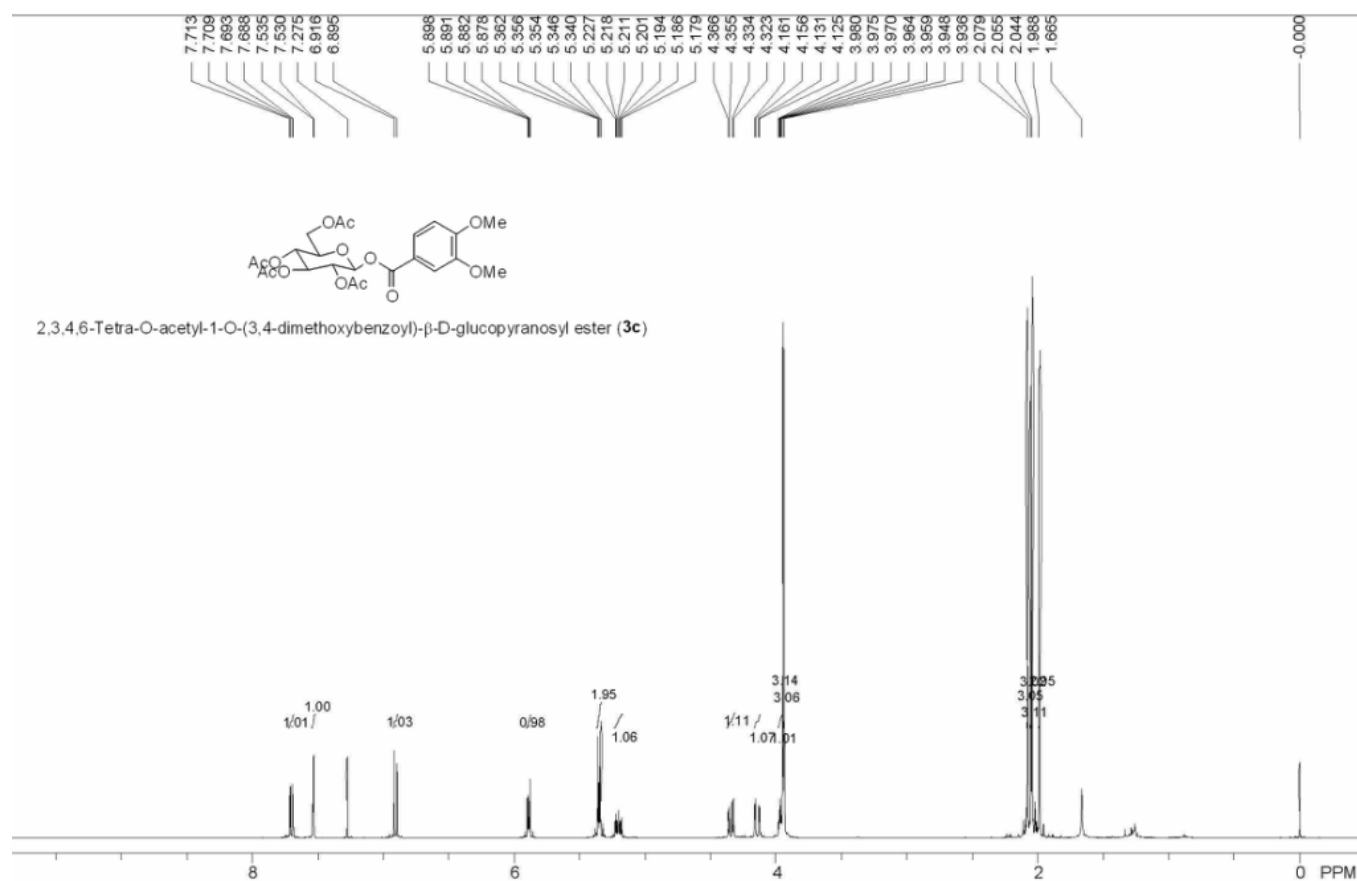

**Figure S5.** <sup>1</sup>H NMR spectrum of compound **3c**

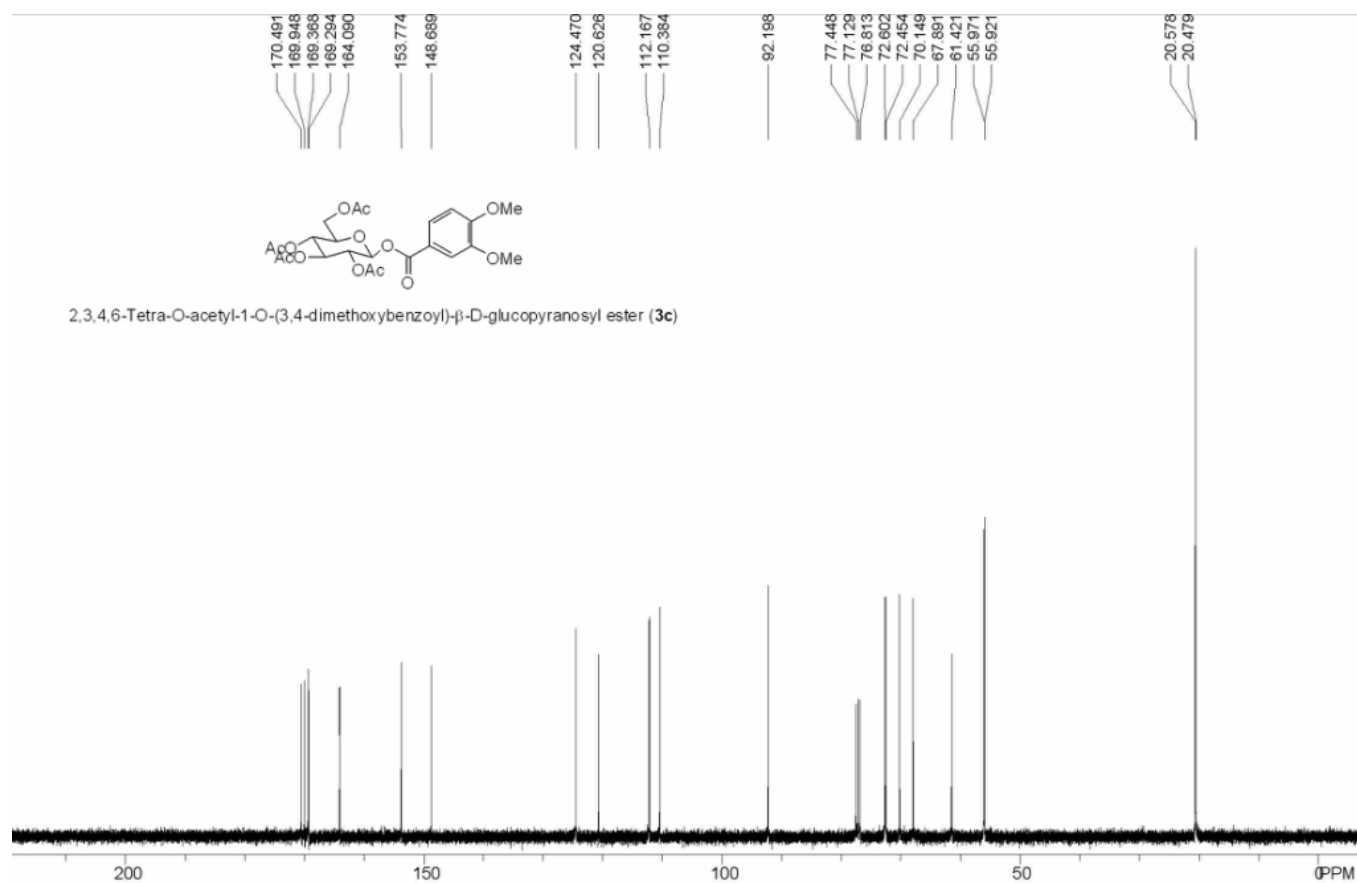

**Figure S6.** <sup>13</sup>C NMR spectrum of compound **3c**

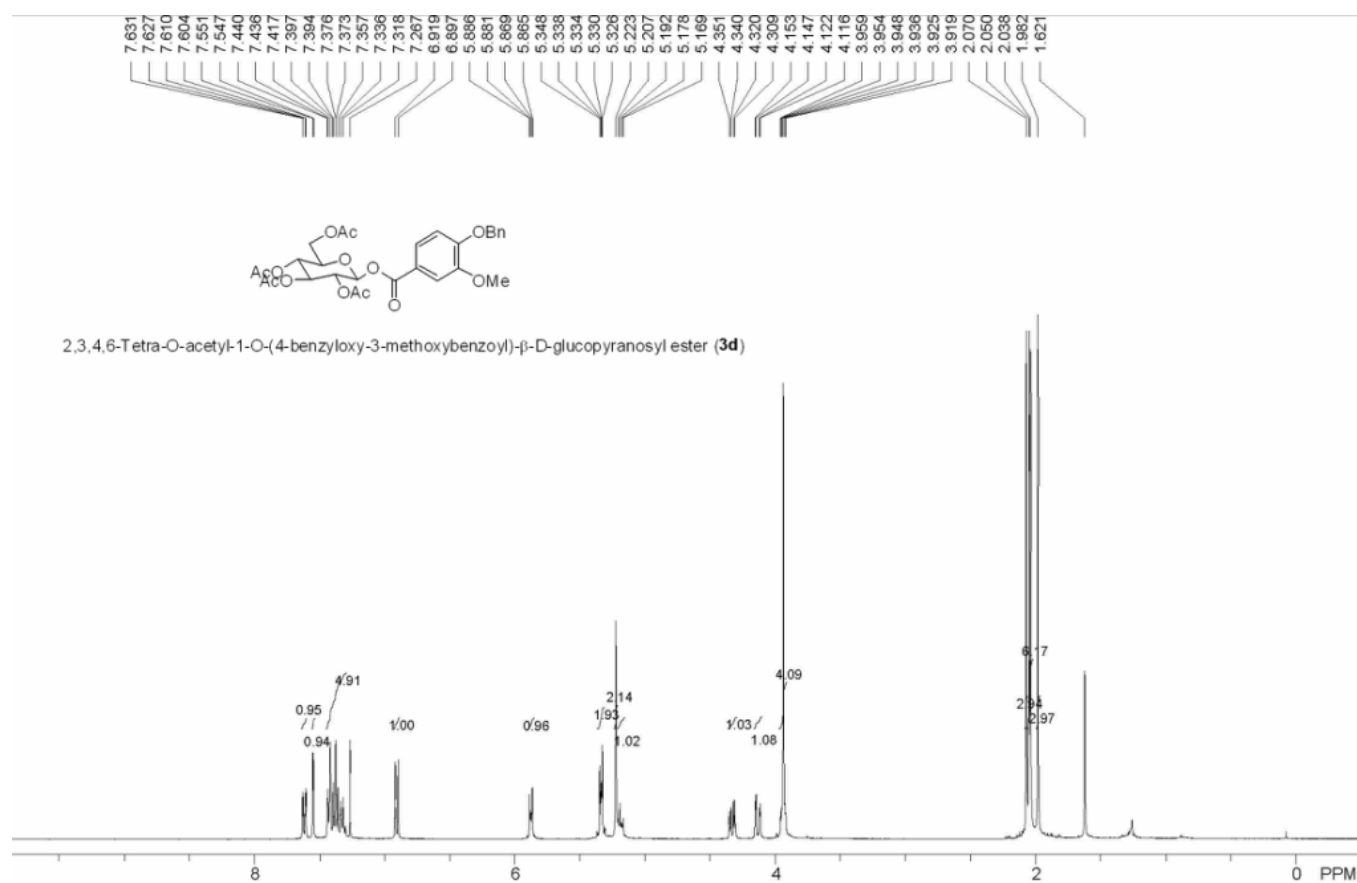

Figure S7. <sup>1</sup>H NMR spectrum of compound 3d

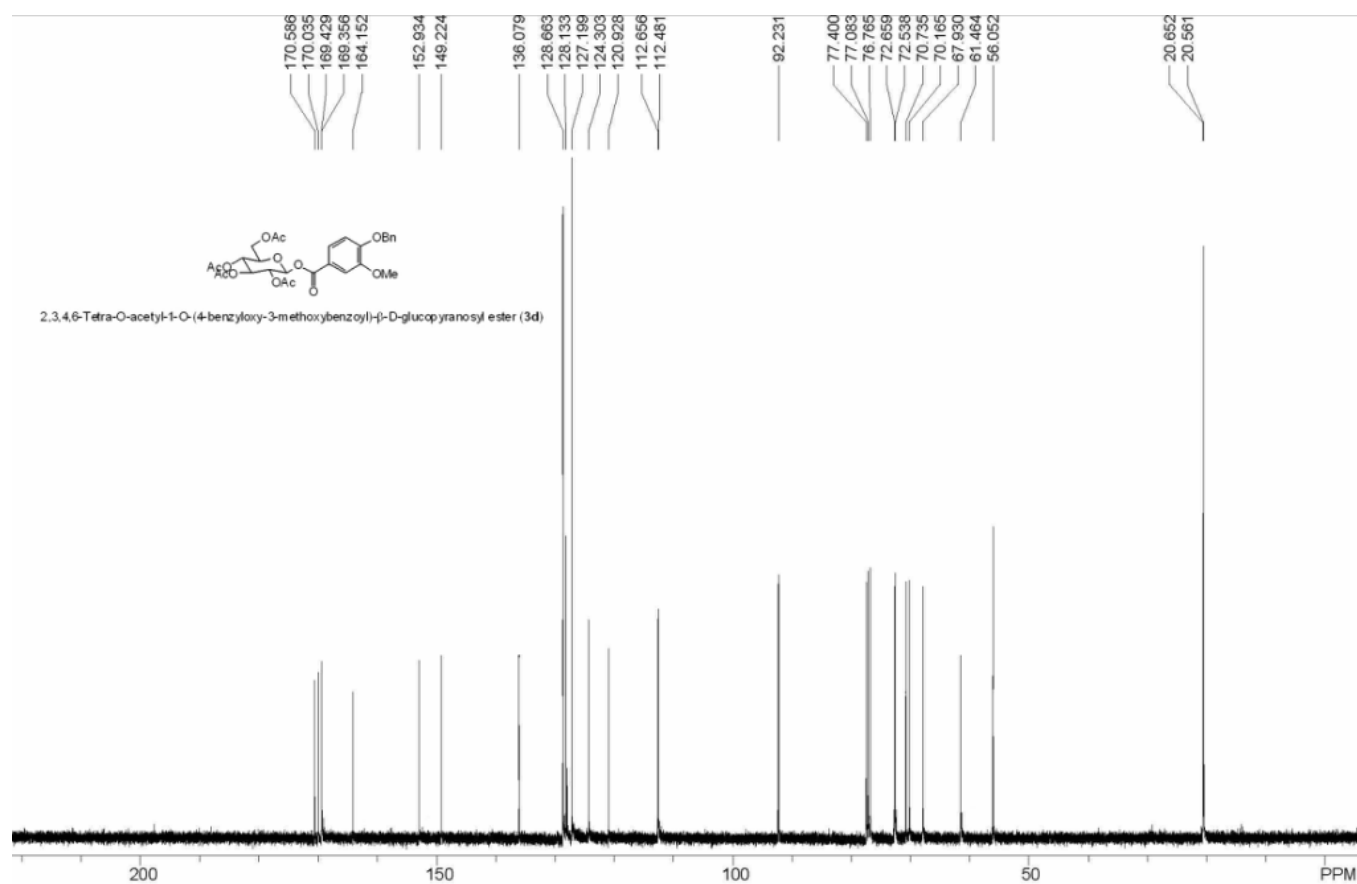

Figure S8. <sup>13</sup>C NMR spectrum of compound 3d

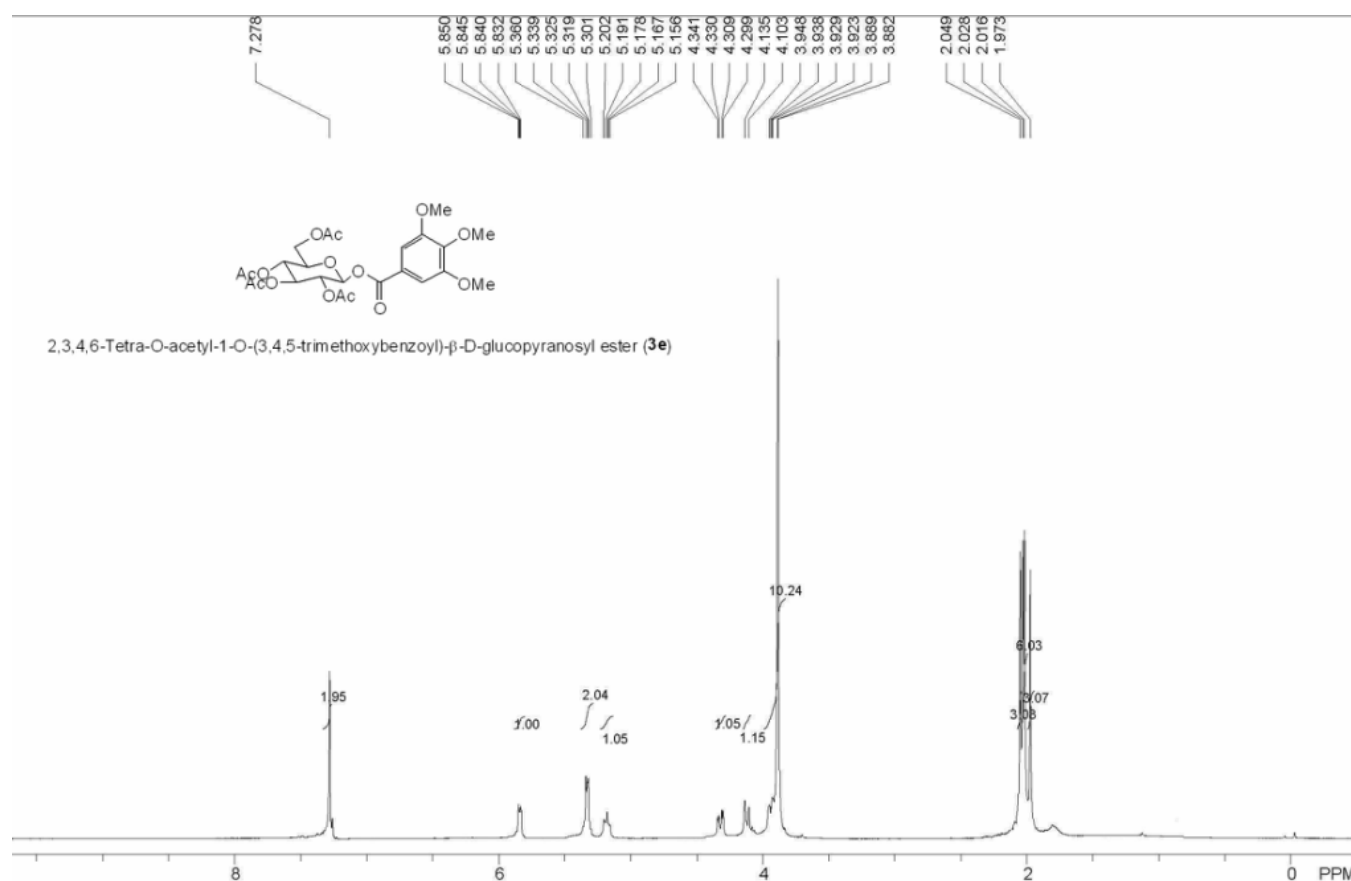

**Figure S9.** <sup>1</sup>H NMR spectrum of compound **3e**

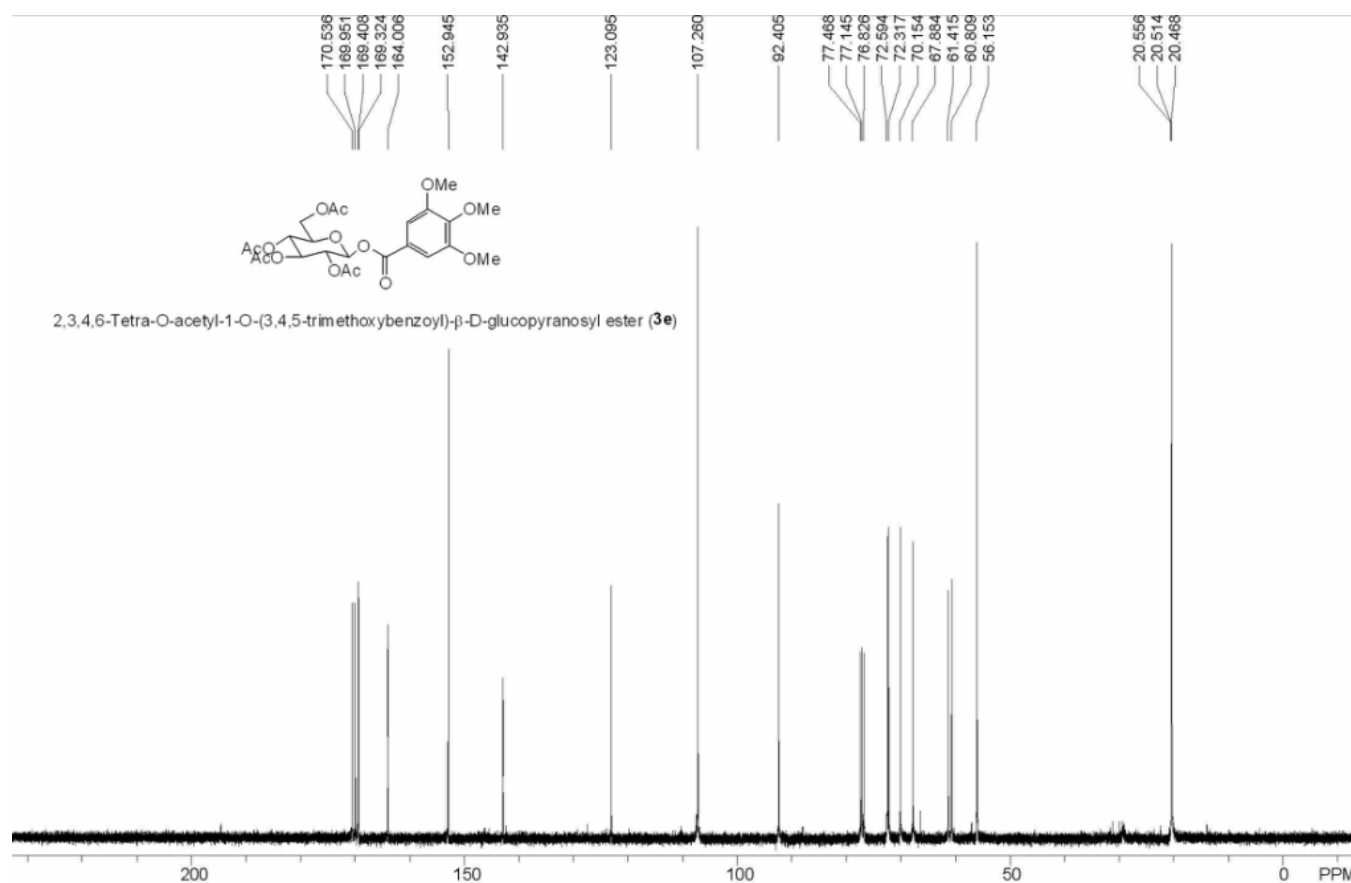

**Figure S10.** <sup>13</sup>C NMR spectrum of compound **3e**

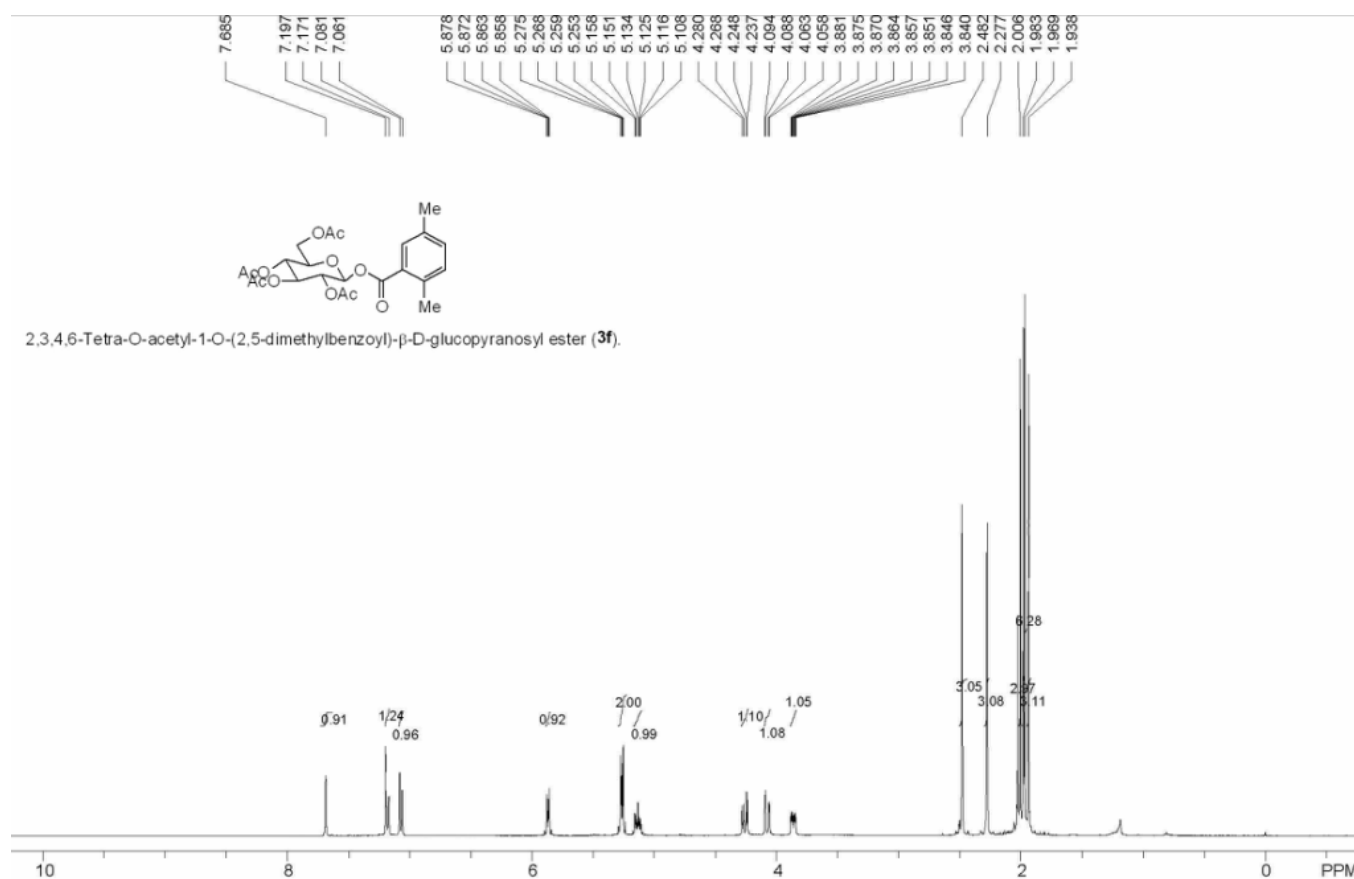

**Figure S11.** <sup>1</sup>H NMR spectrum of compound **3f**

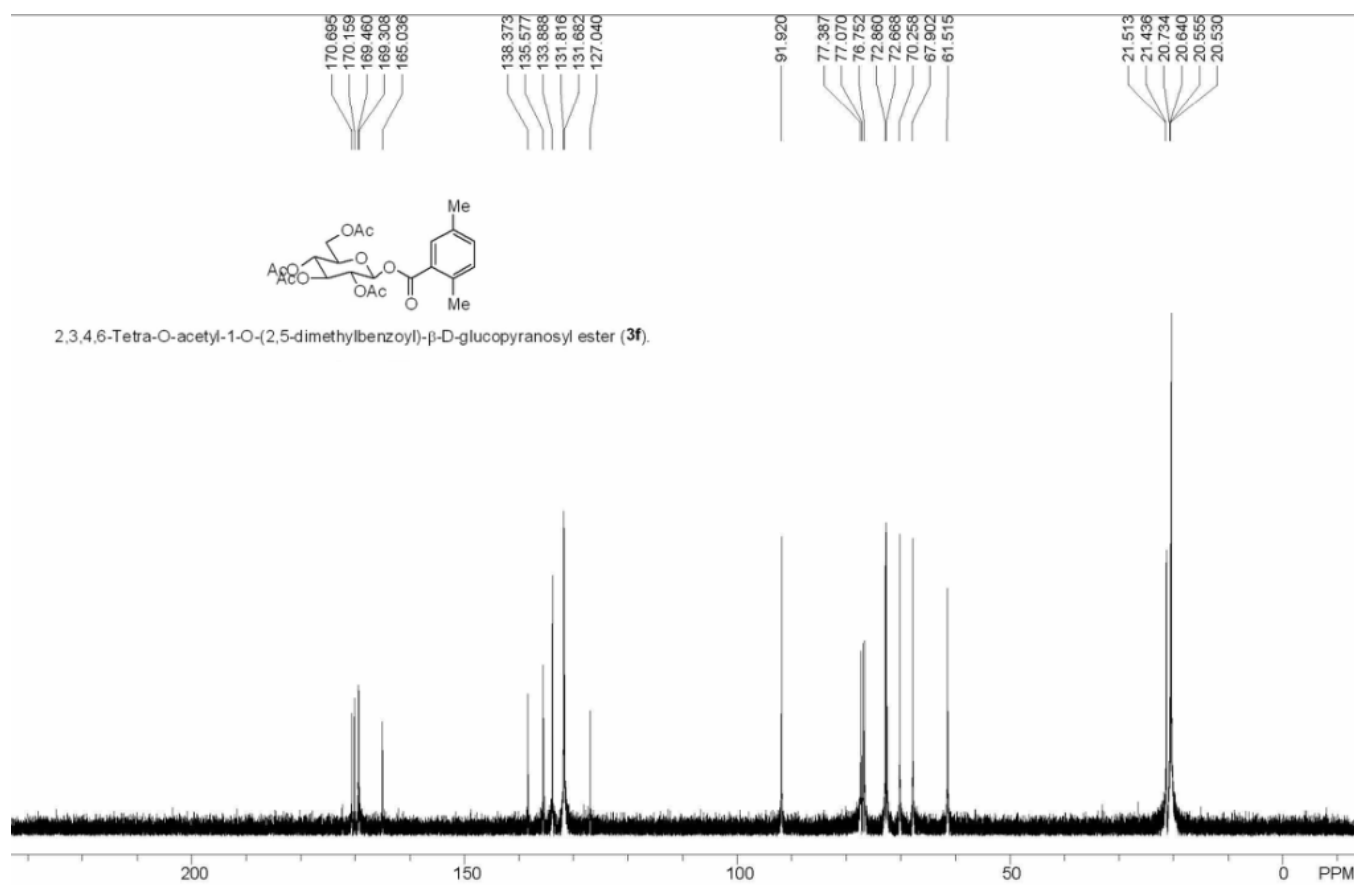

**Figure S12.** <sup>13</sup>C NMR spectrum of compound **3f**

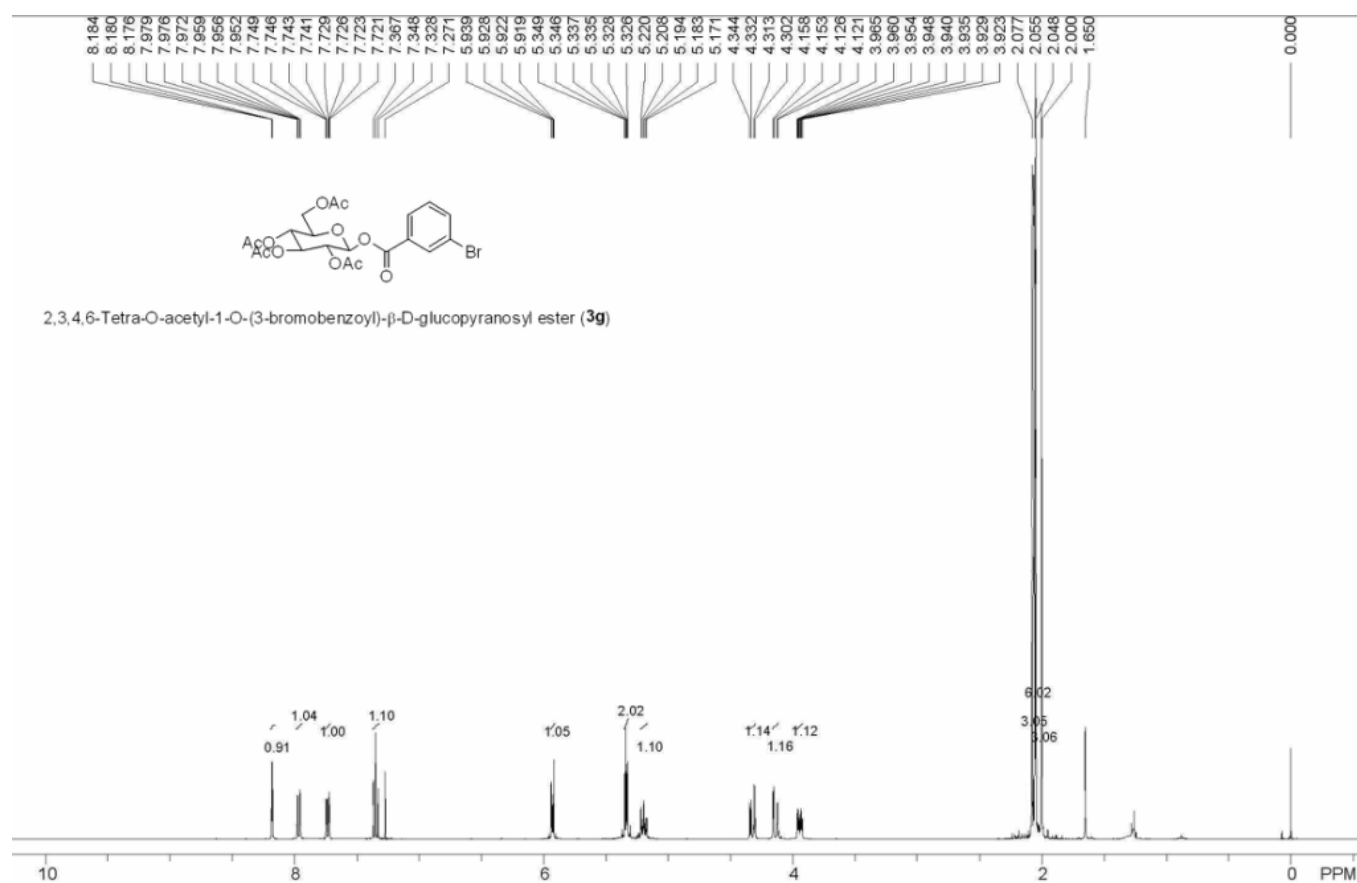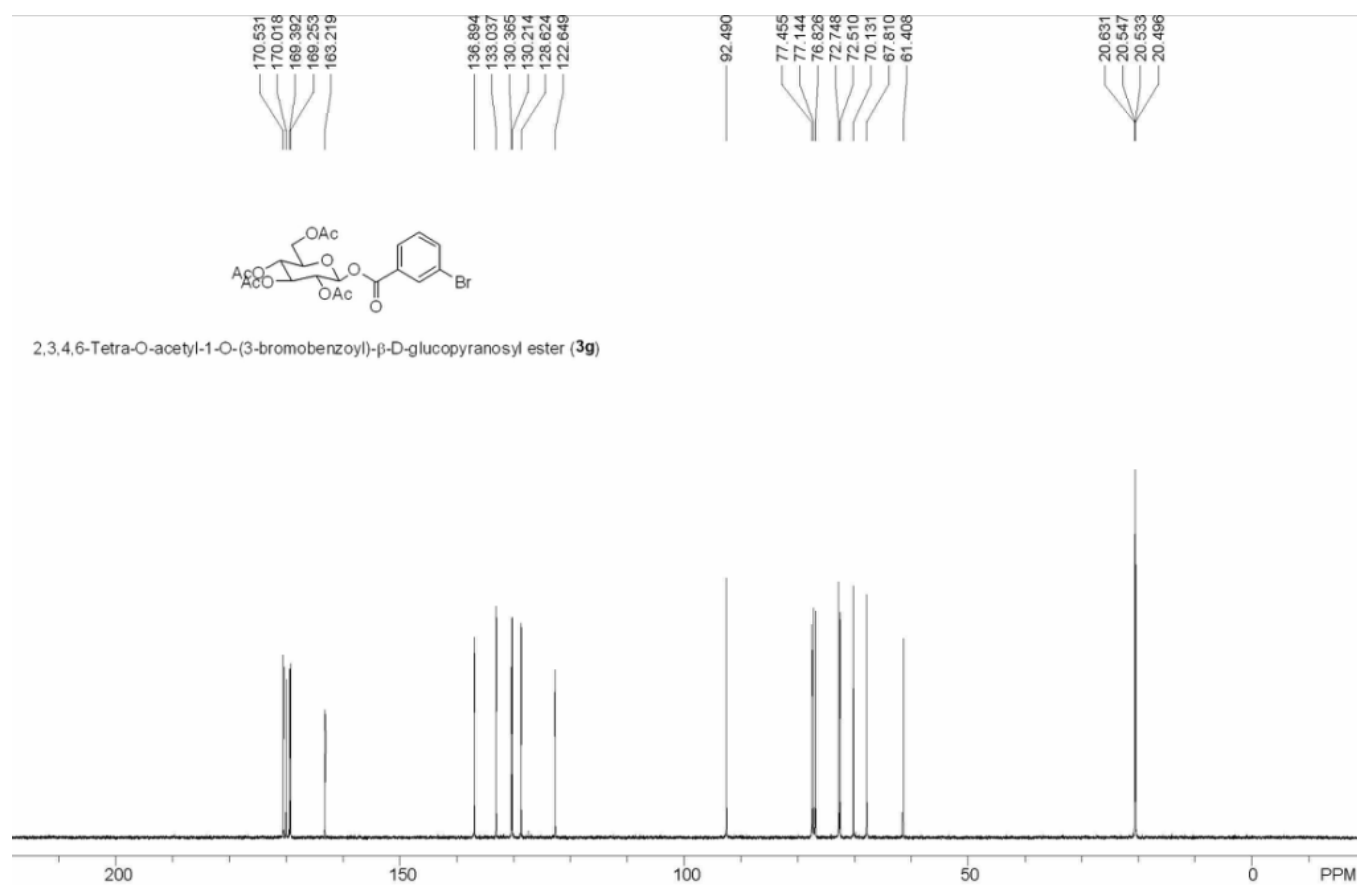

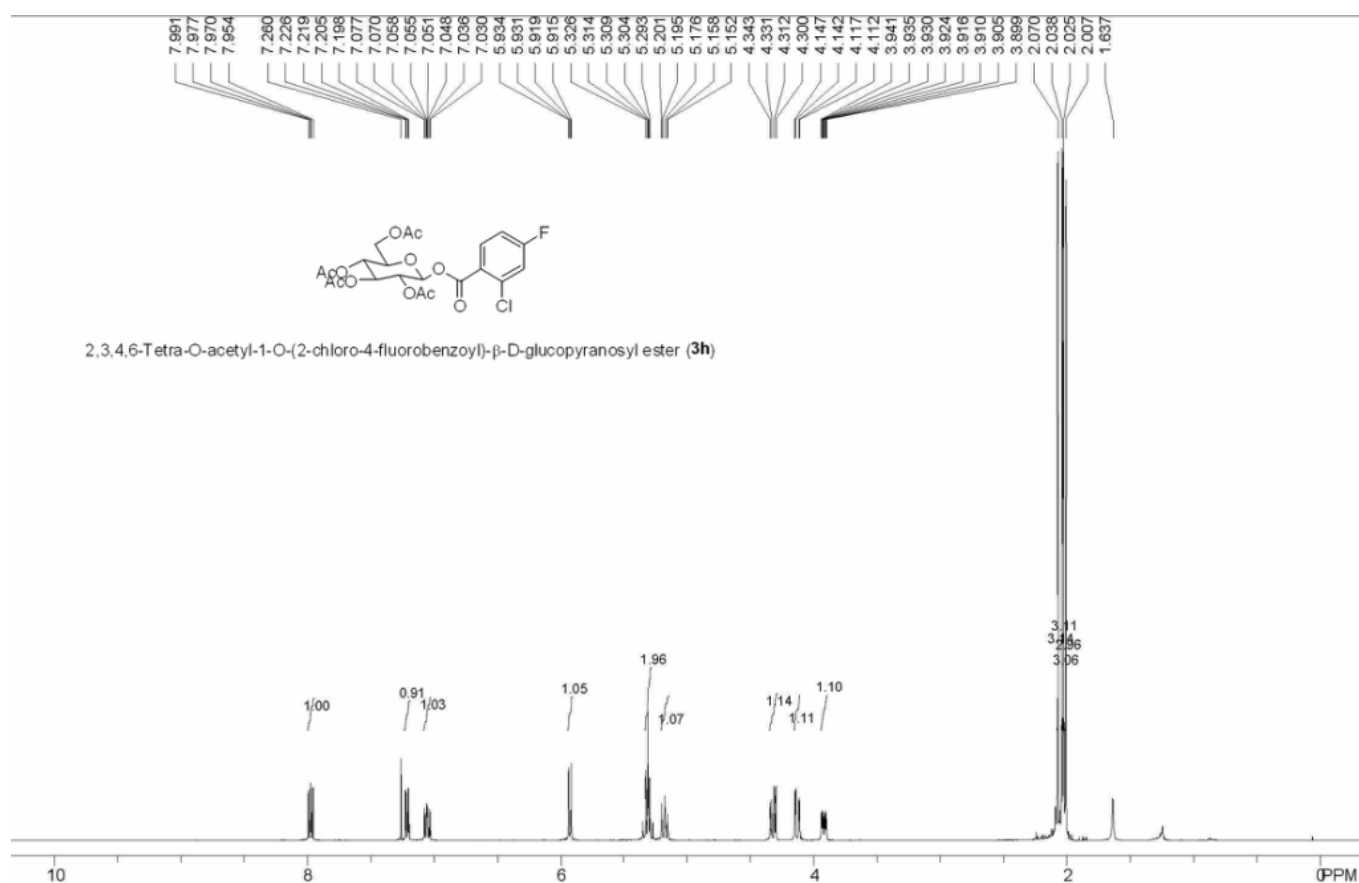

**Figure S15.** <sup>1</sup>H NMR spectrum of compound **3h**

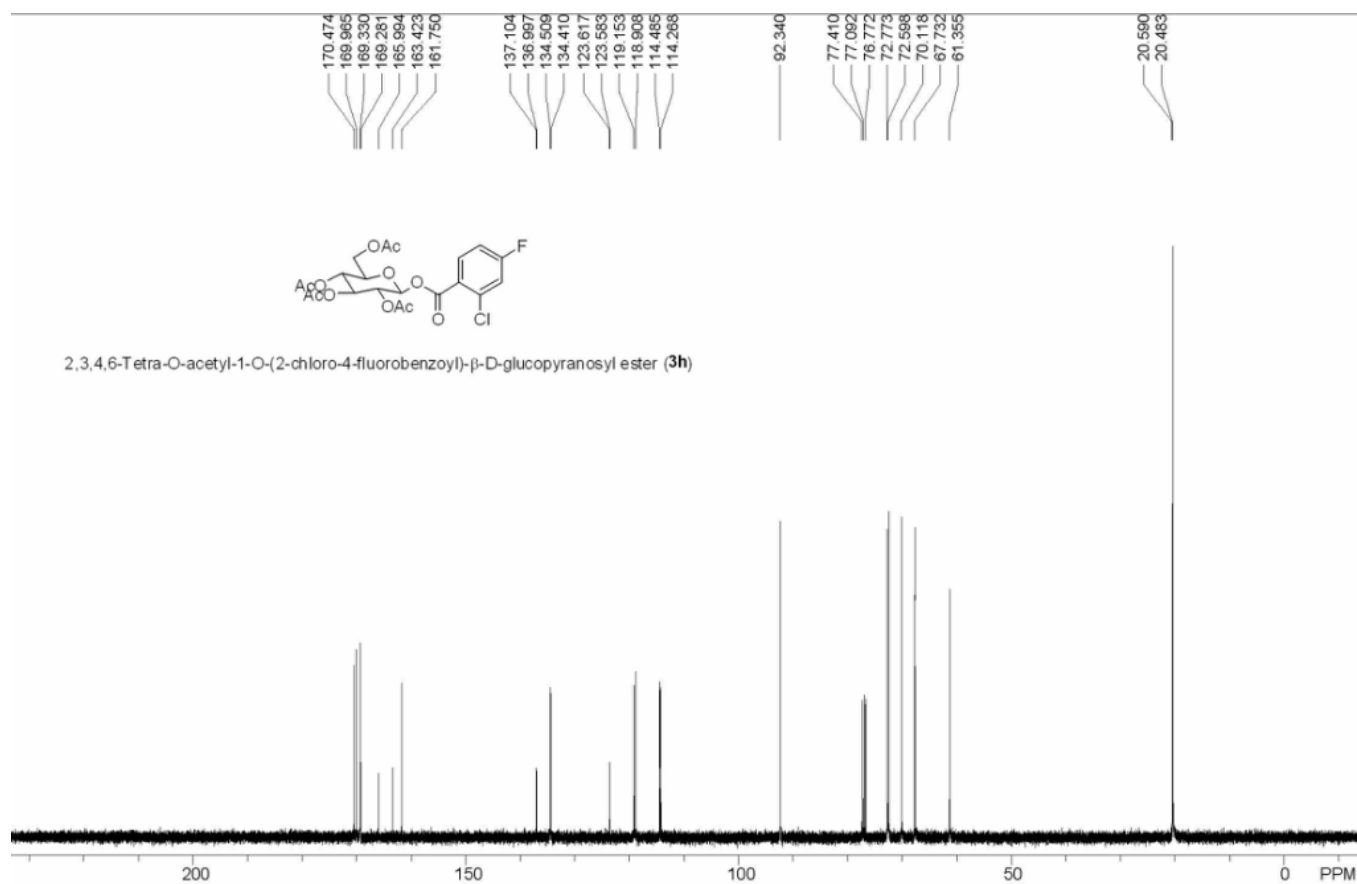

**Figure S16.** <sup>13</sup>C NMR spectrum of compound **3h**

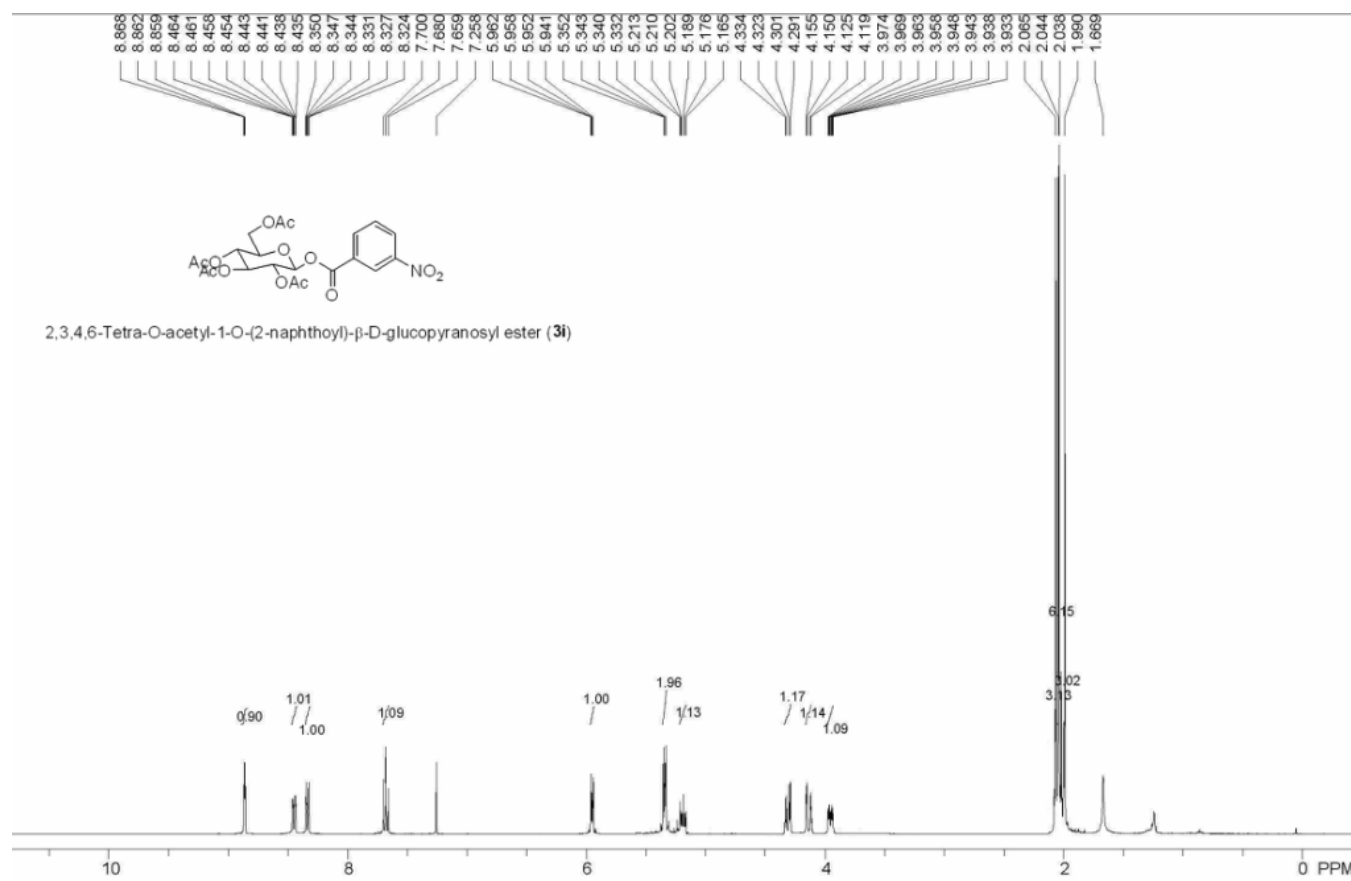

**Figure S17.** <sup>1</sup>H NMR spectrum of compound **3i**

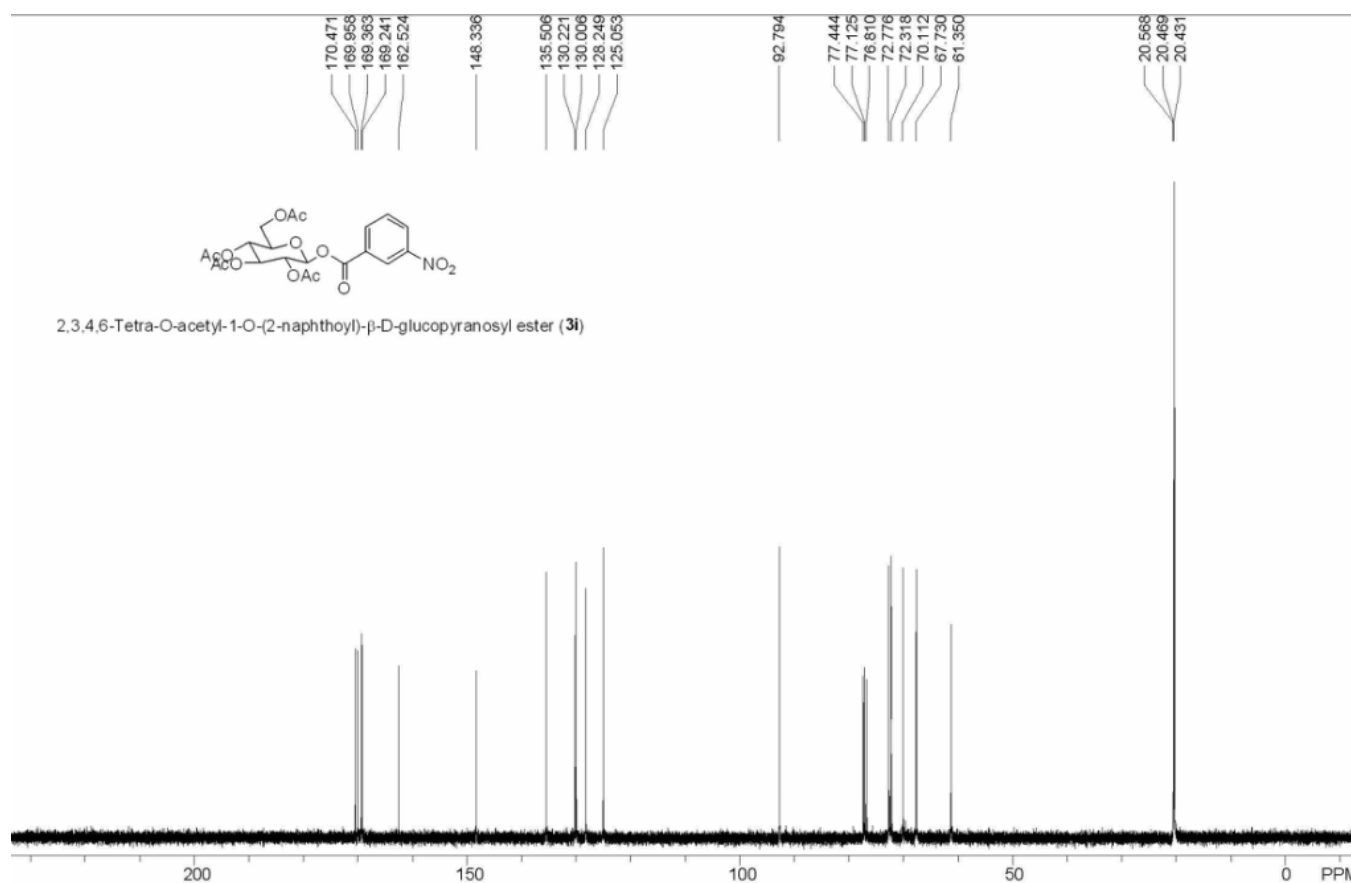

**Figure S18.** <sup>13</sup>C NMR spectrum of compound **3i**

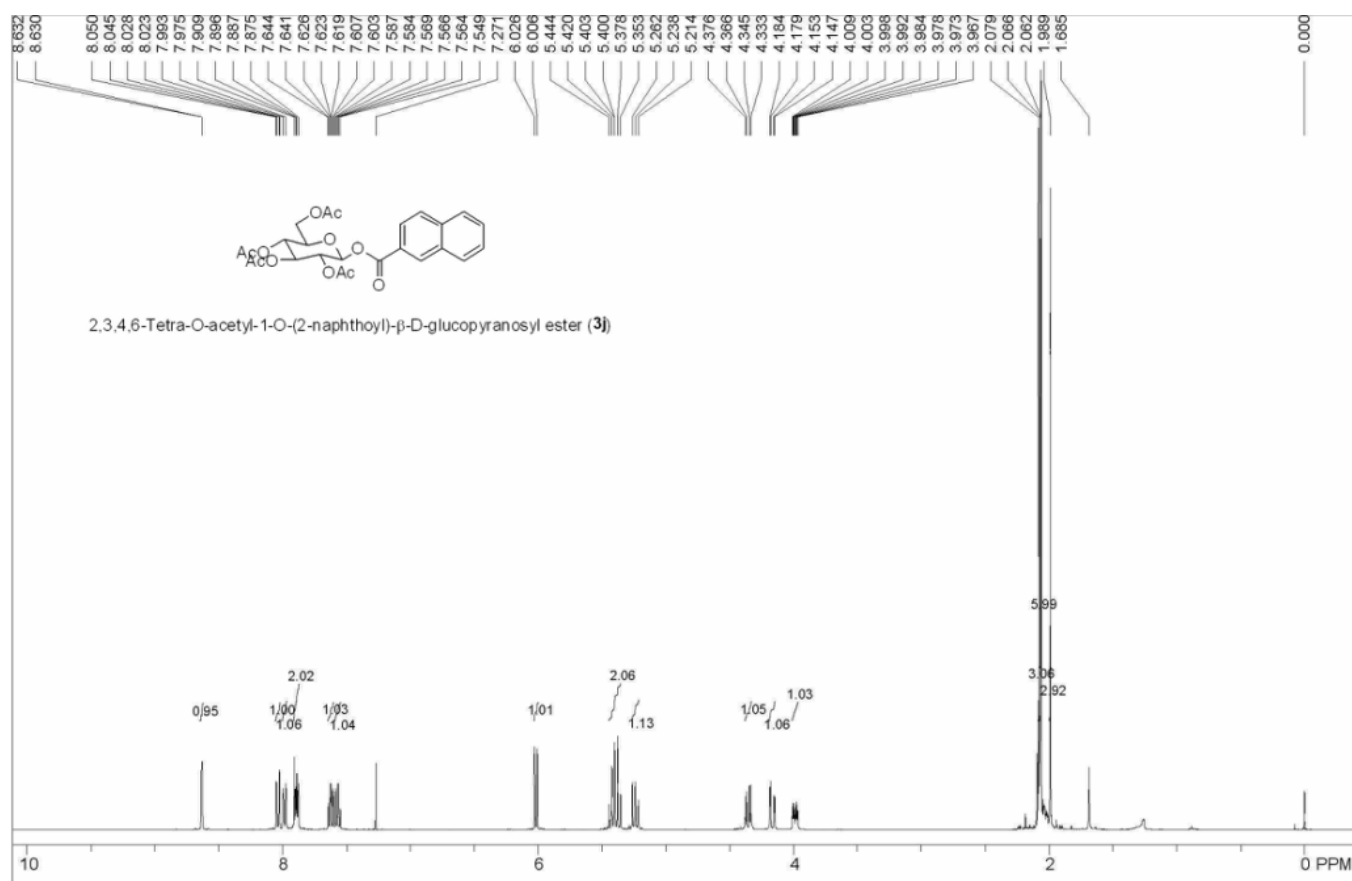

**Figure S19.** <sup>1</sup>H NMR spectrum of compound **3j**

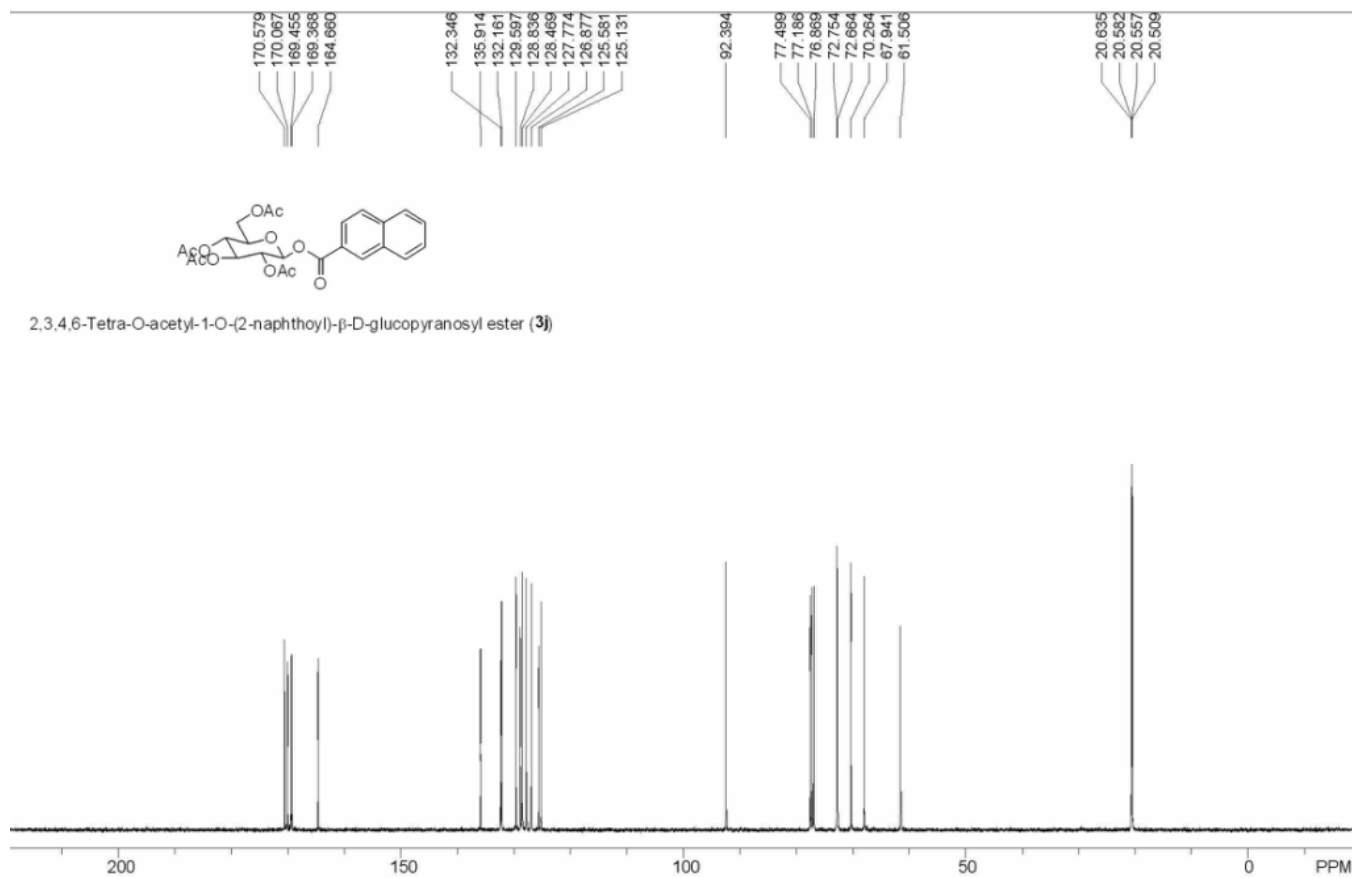

**Figure S20.** <sup>13</sup>C NMR spectrum of compound **3j**

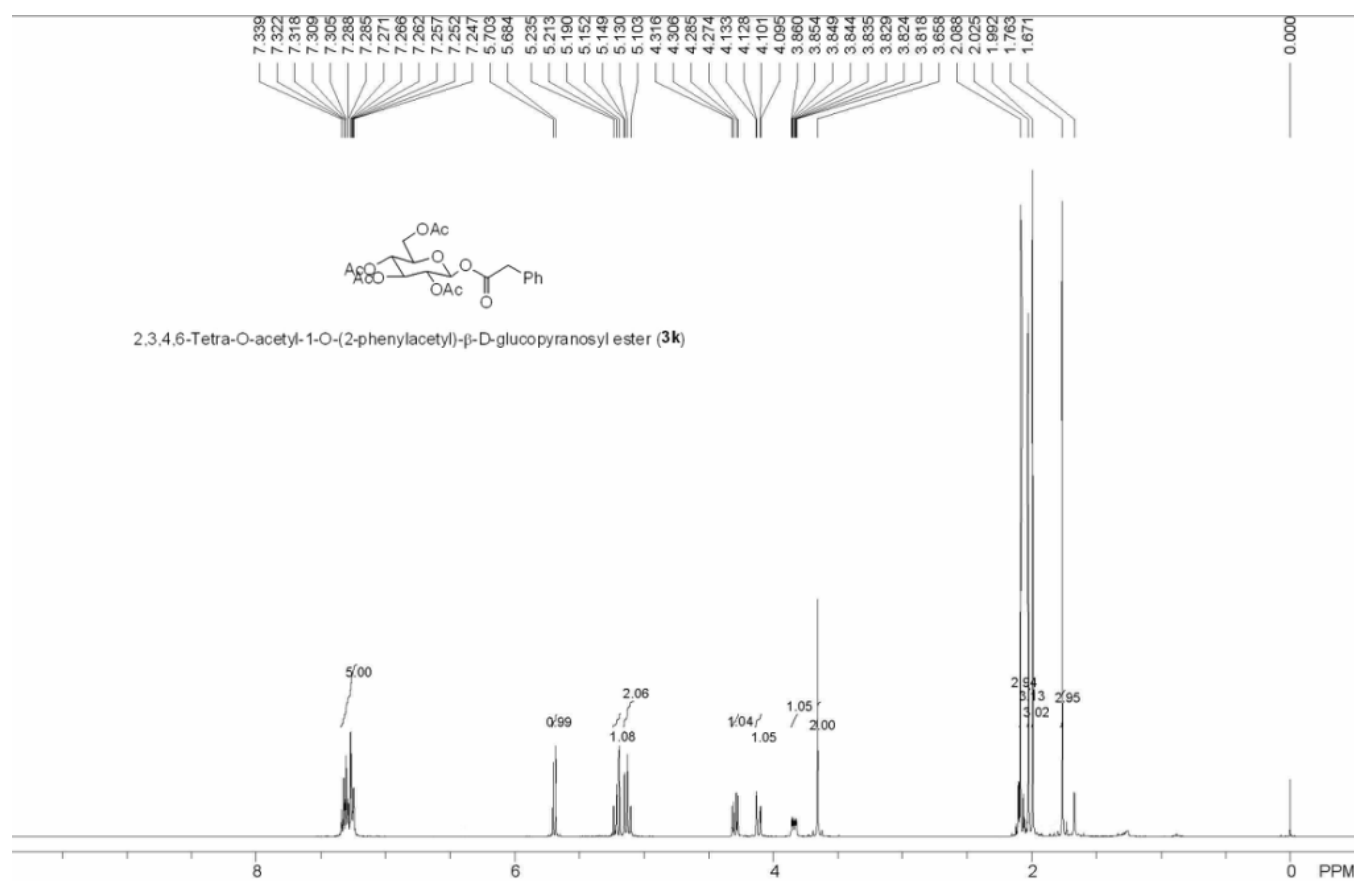

**Figure S21.** <sup>1</sup>H NMR spectrum of compound **3k**

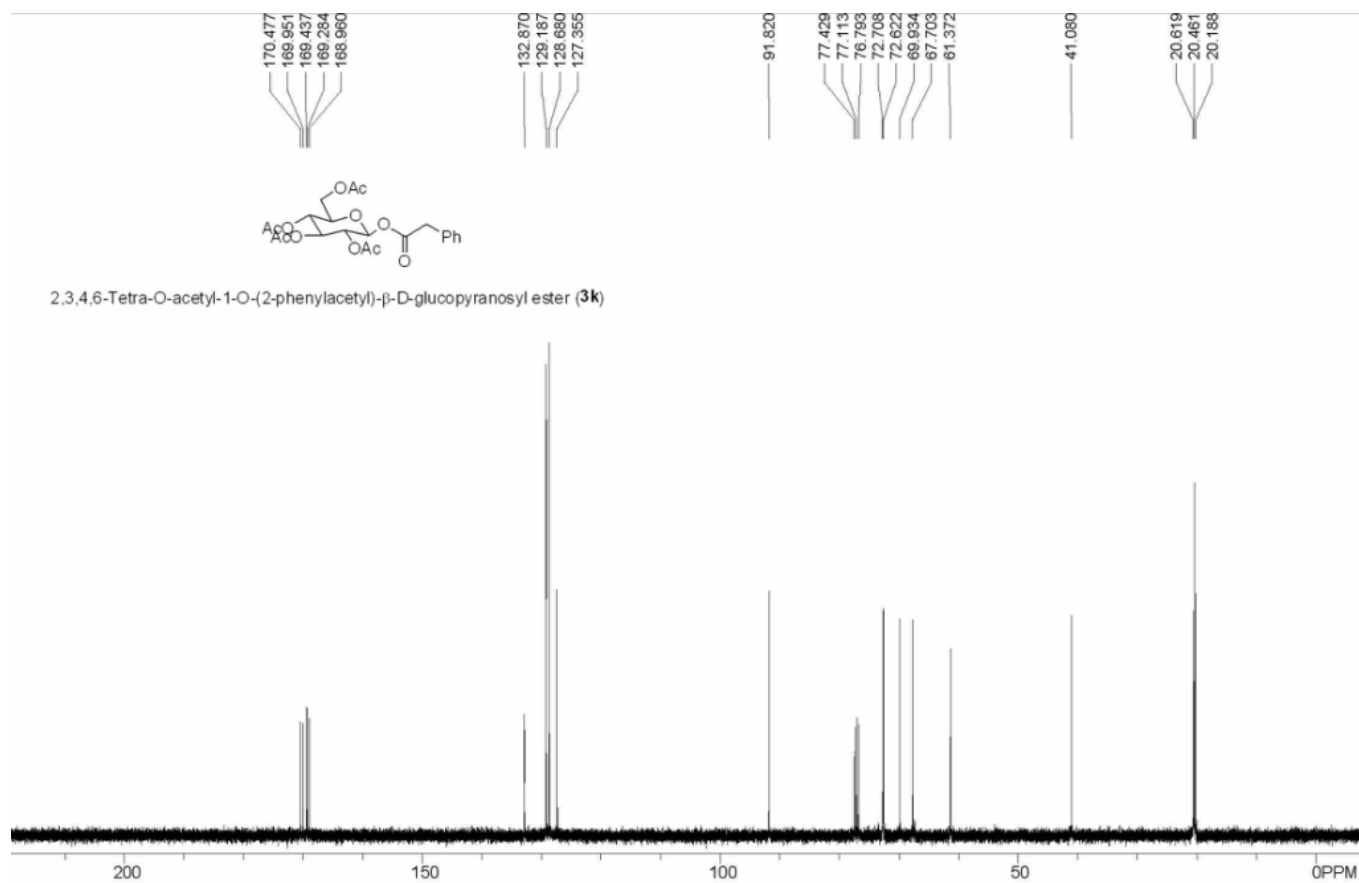

**Figure S22.** <sup>13</sup>C NMR spectrum of compound **3k**

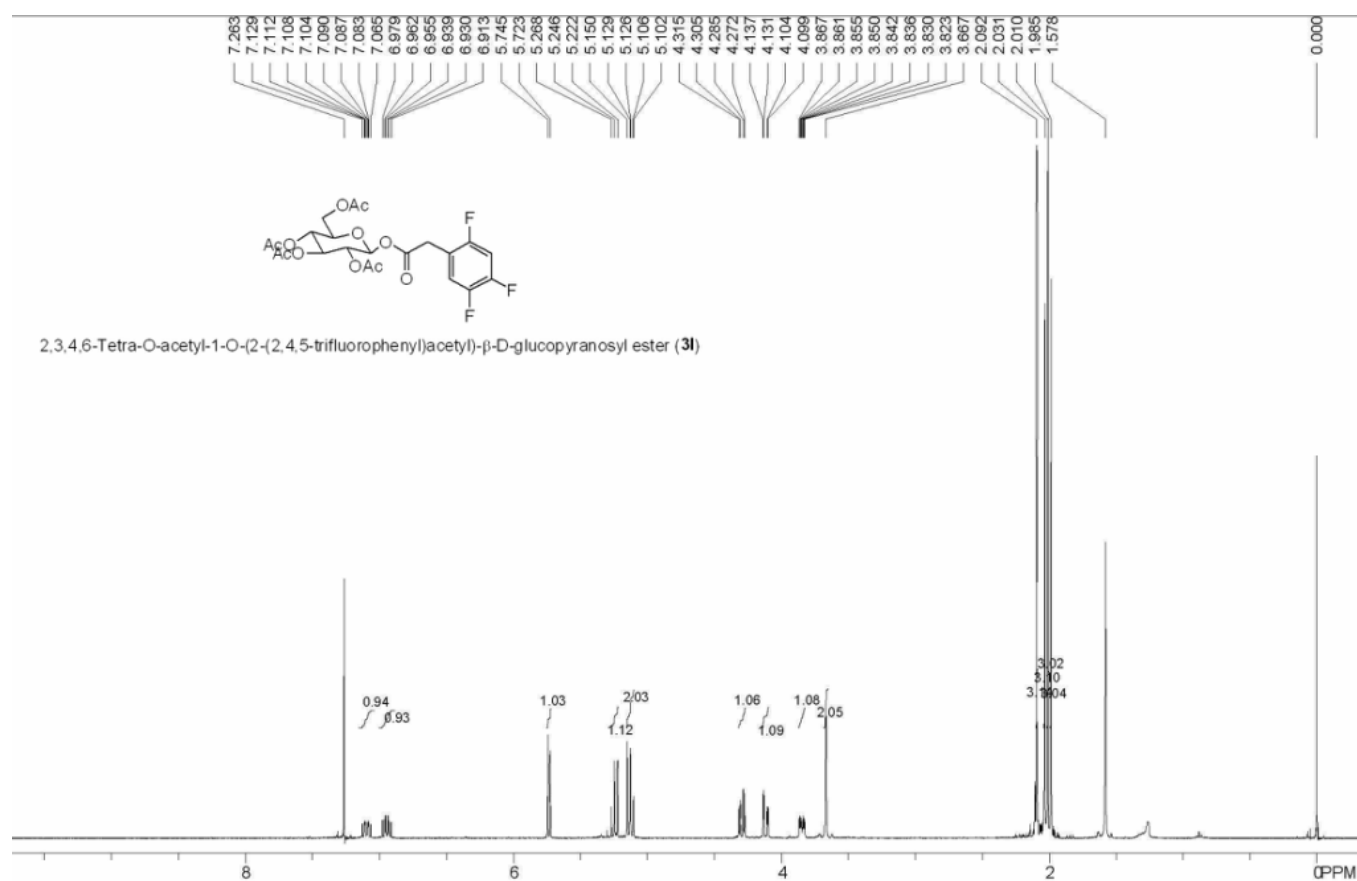

**Figure S23.** <sup>1</sup>H NMR spectrum of compound **3I**

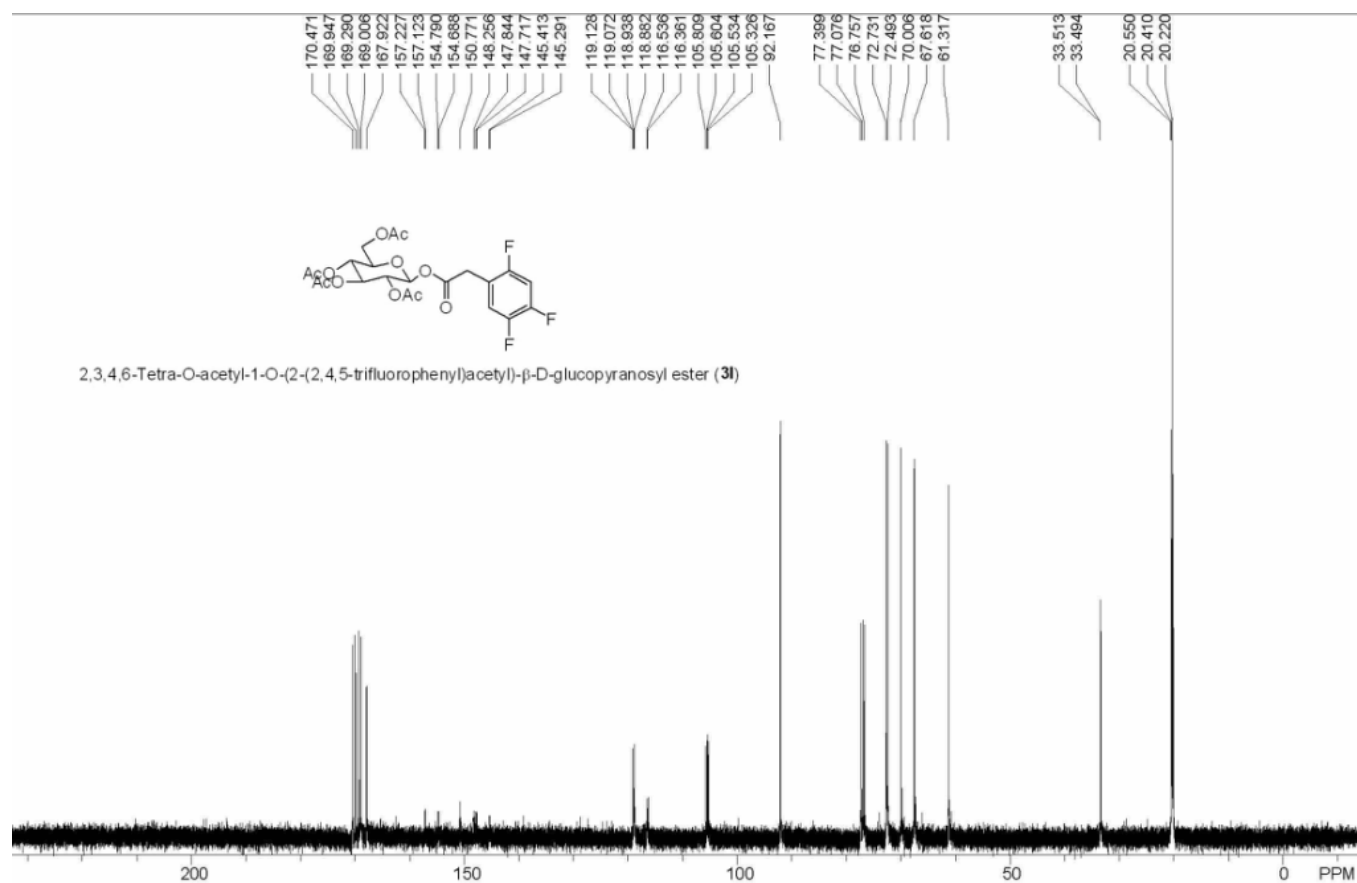

**Figure S24.** <sup>13</sup>C NMR spectrum of compound **3I**

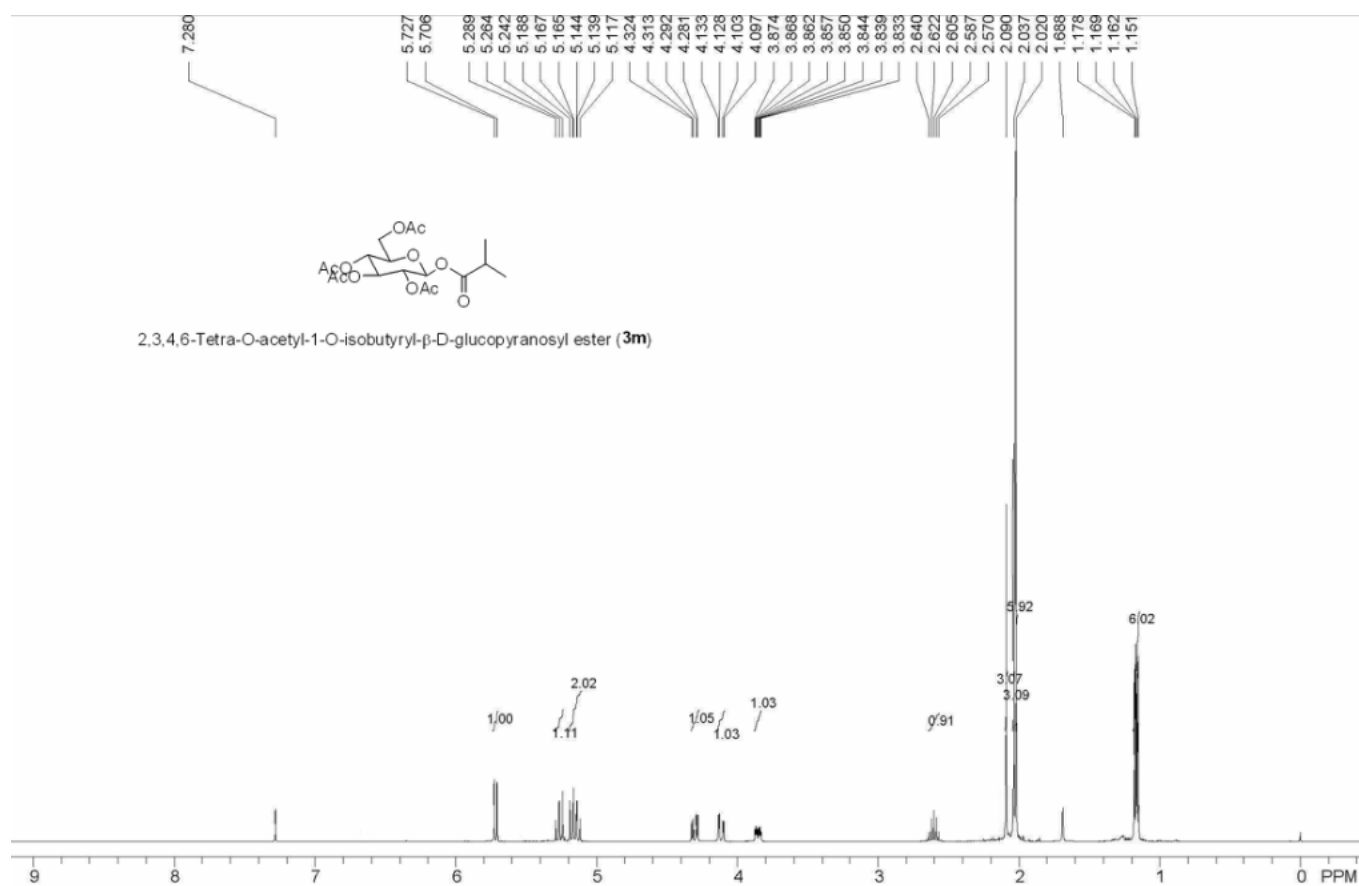

Figure S25. <sup>1</sup>H NMR spectrum of compound 3m

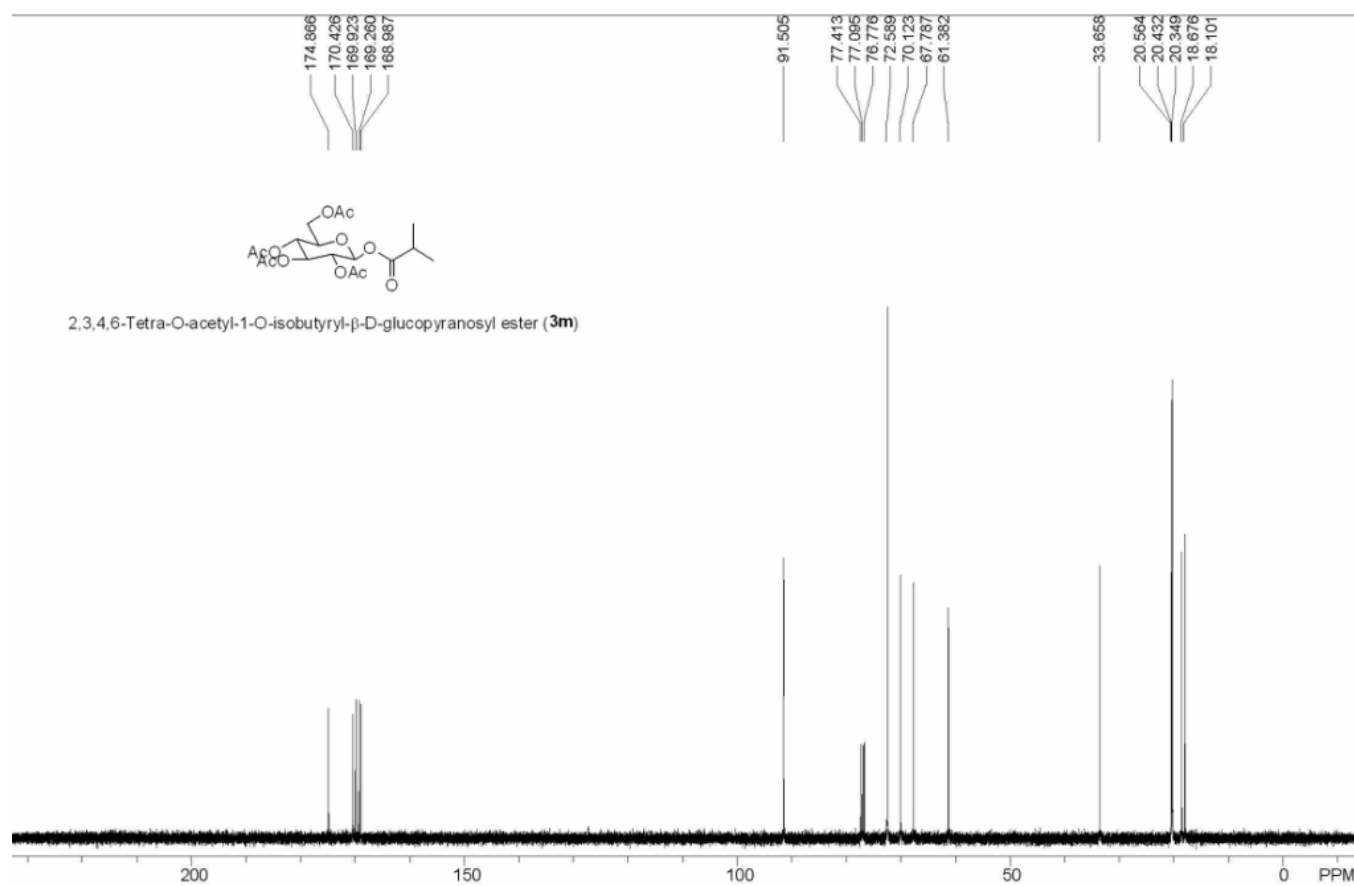

Figure S26. <sup>13</sup>C NMR spectrum of compound 3m

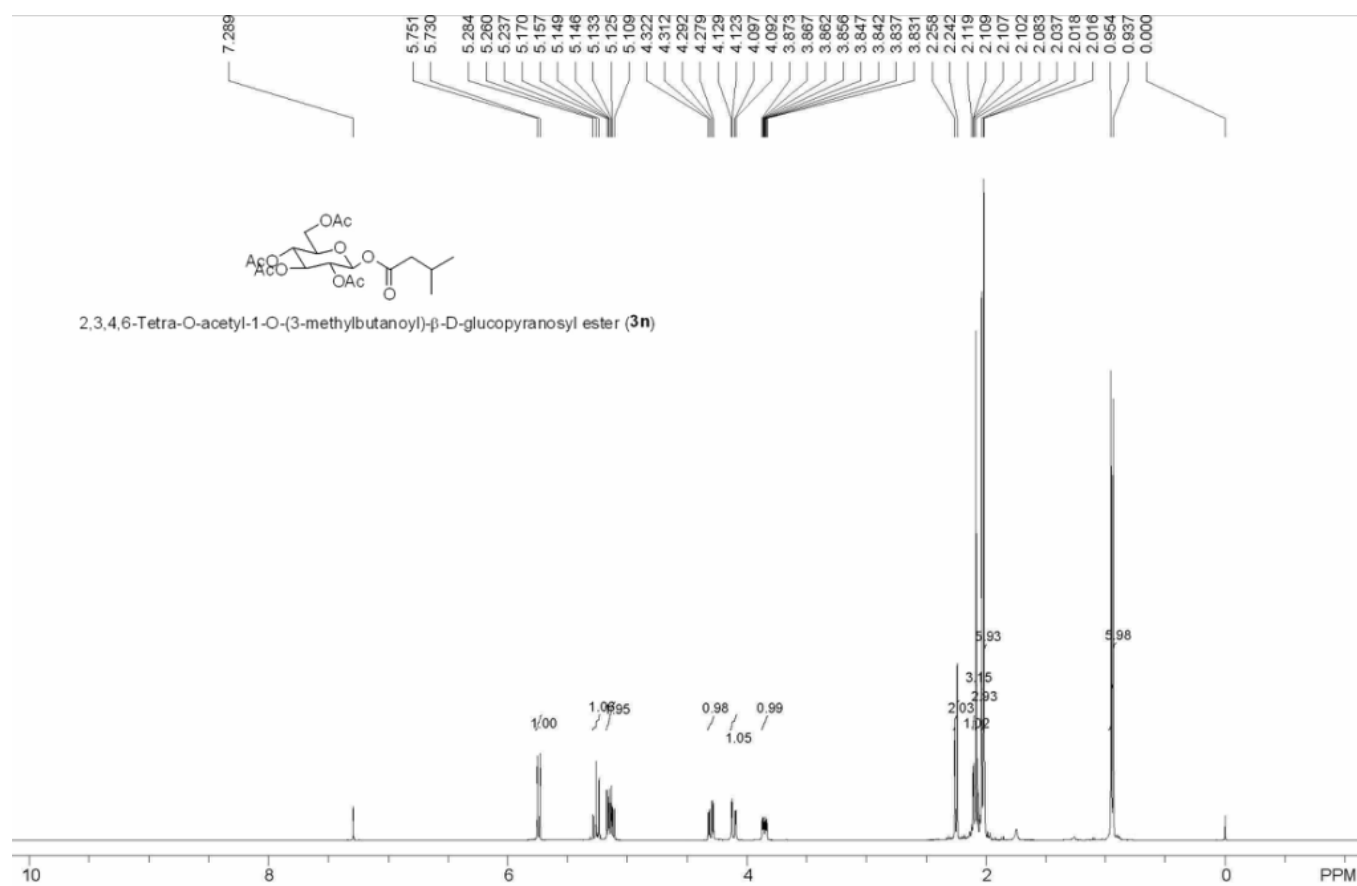

**Figure S27.** <sup>1</sup>H NMR spectrum of compound **3n**

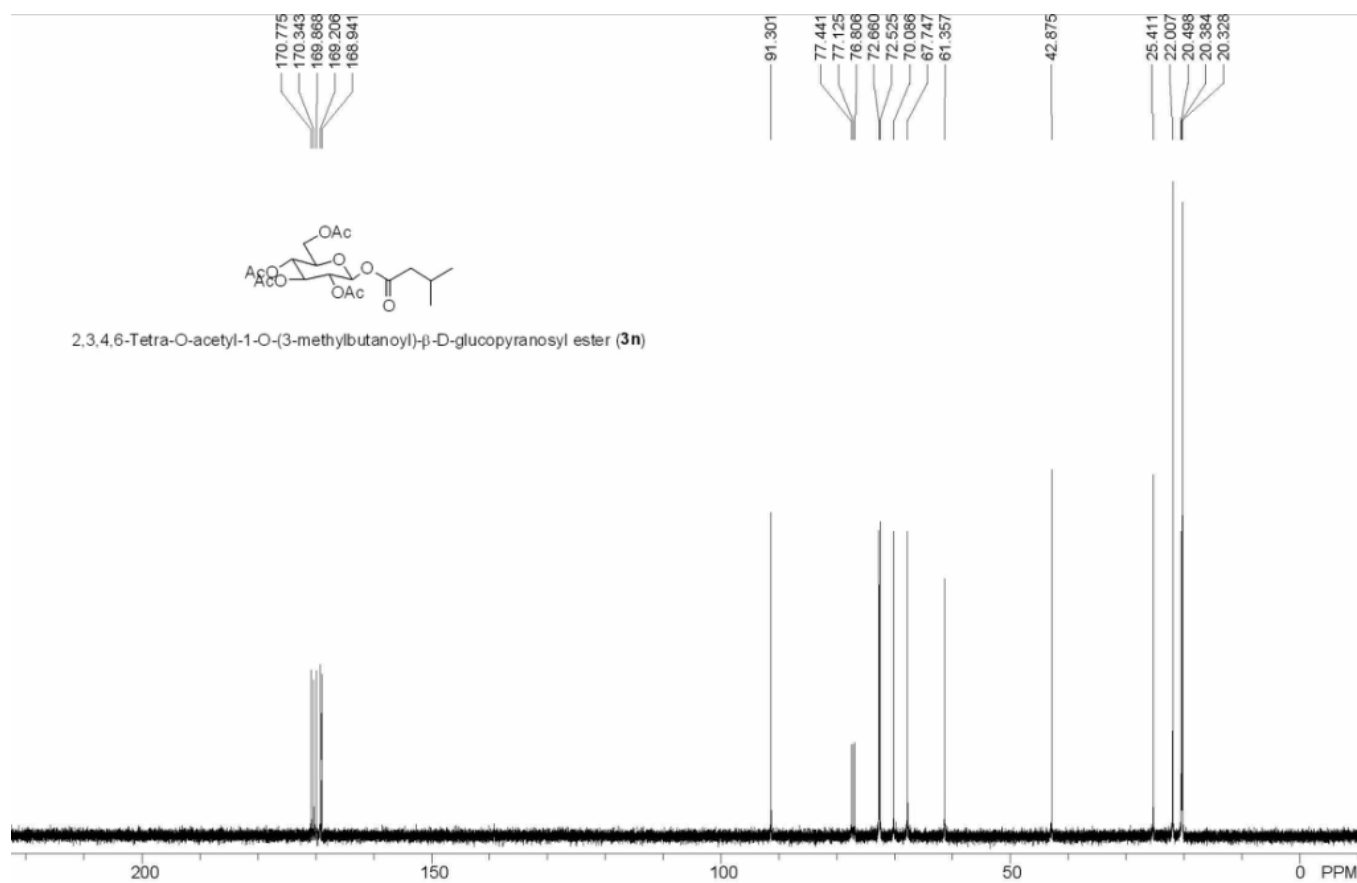

**Figure S28.** <sup>13</sup>C NMR spectrum of compound **3n**

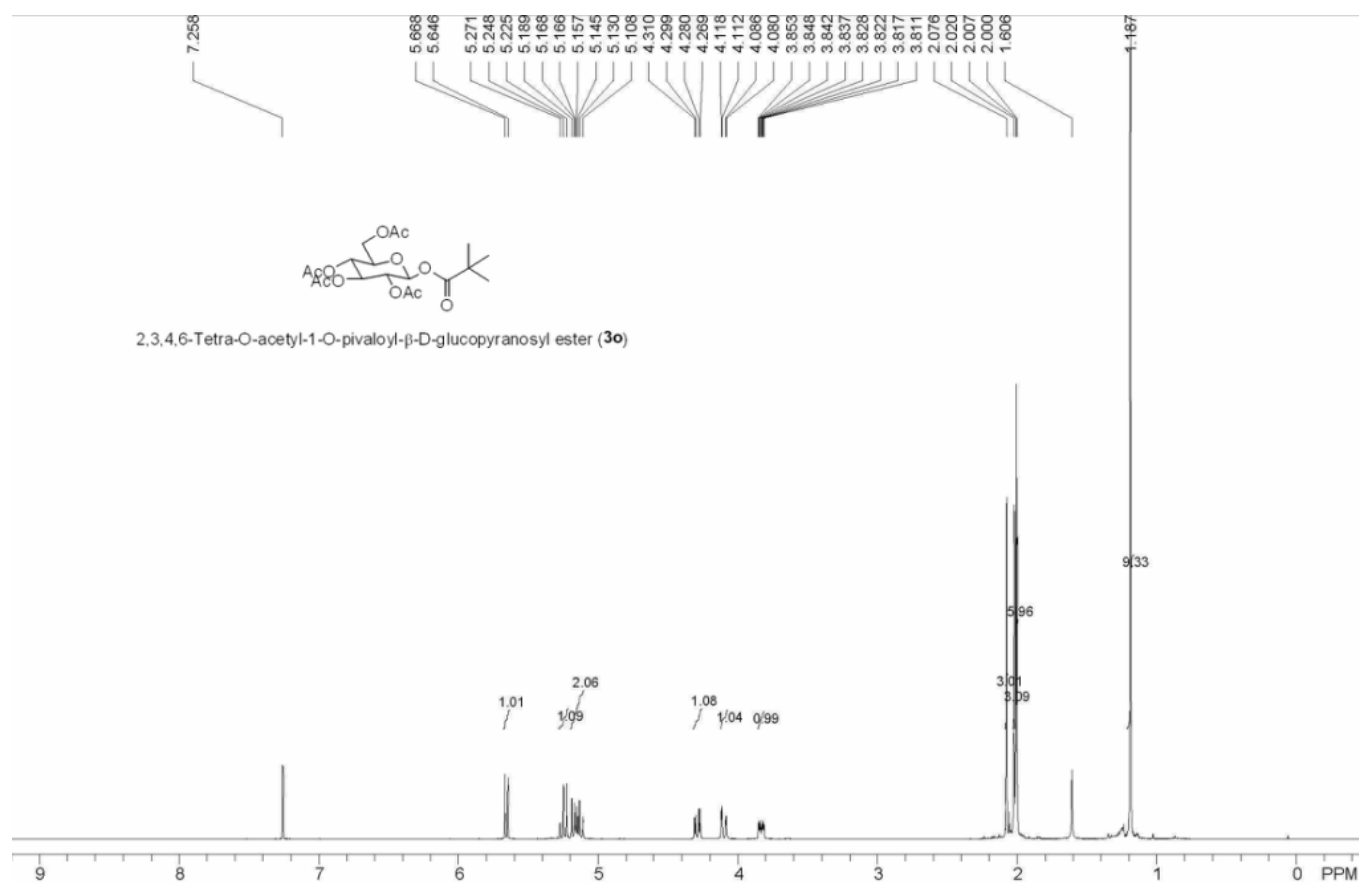

**Figure S29.** <sup>1</sup>H NMR spectrum of compound **3o**

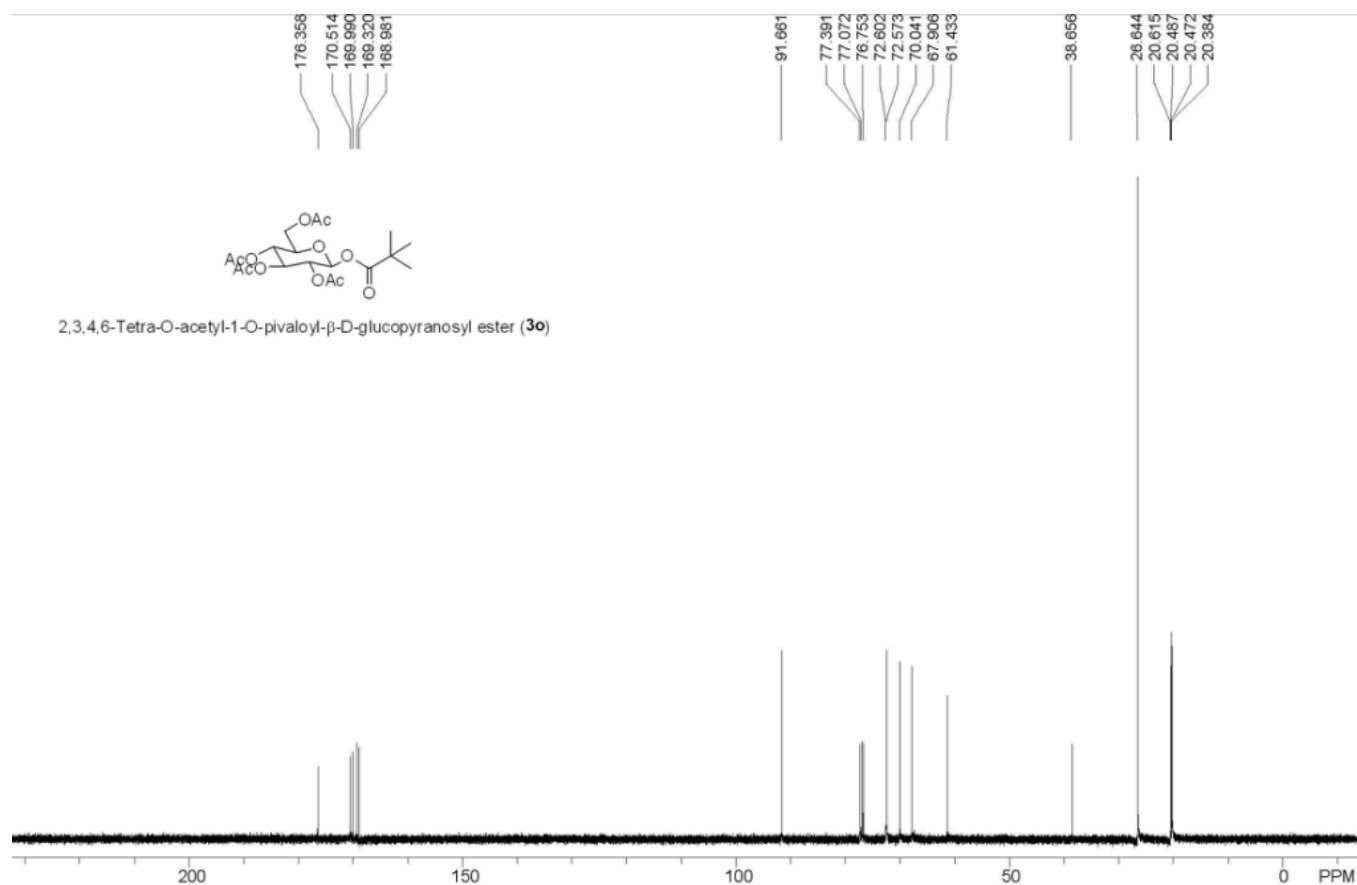

**Figure S30.** <sup>13</sup>C NMR spectrum of compound **3o**

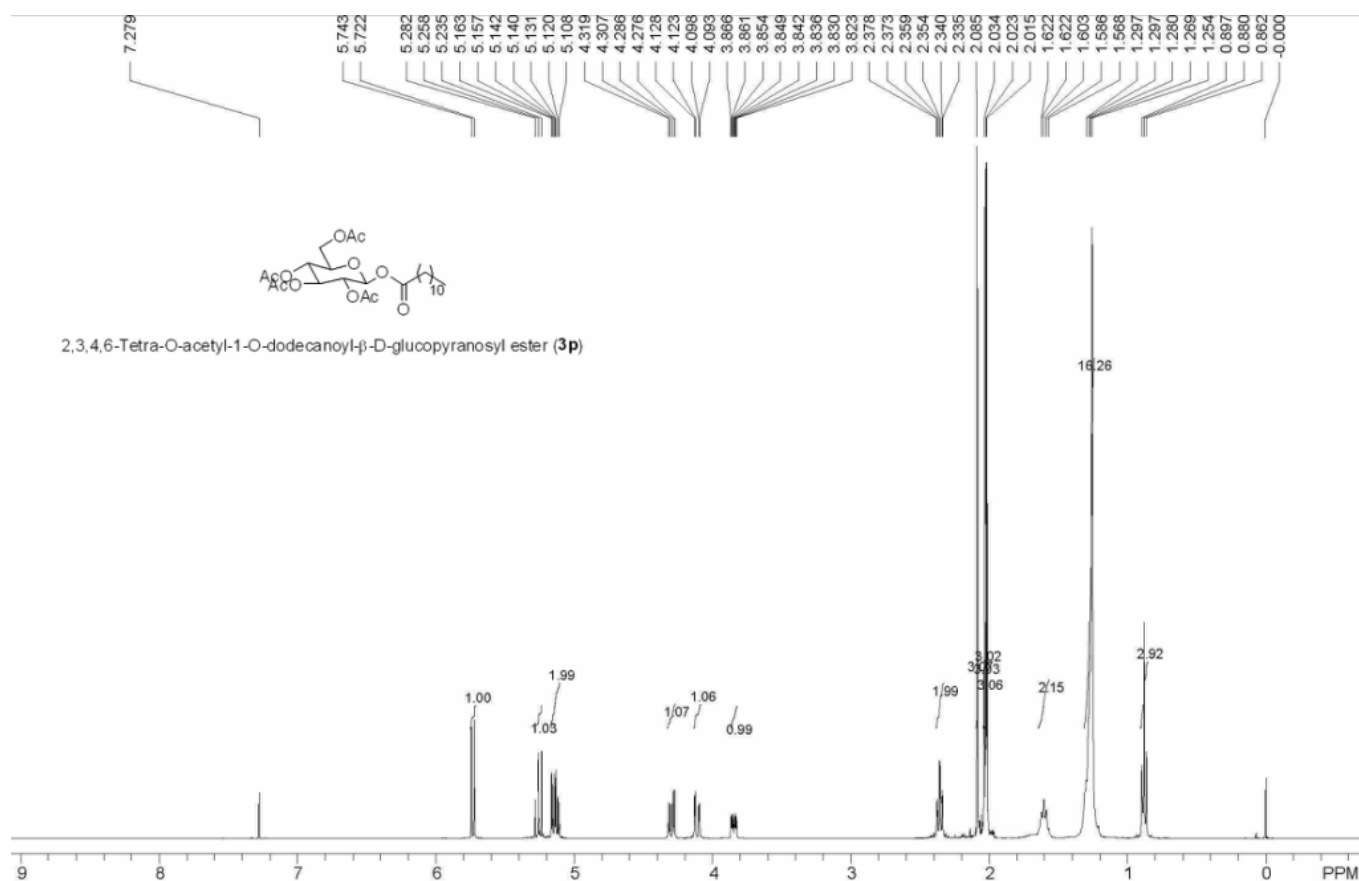

**Figure S31.** <sup>1</sup>H NMR spectrum of compound **3p**

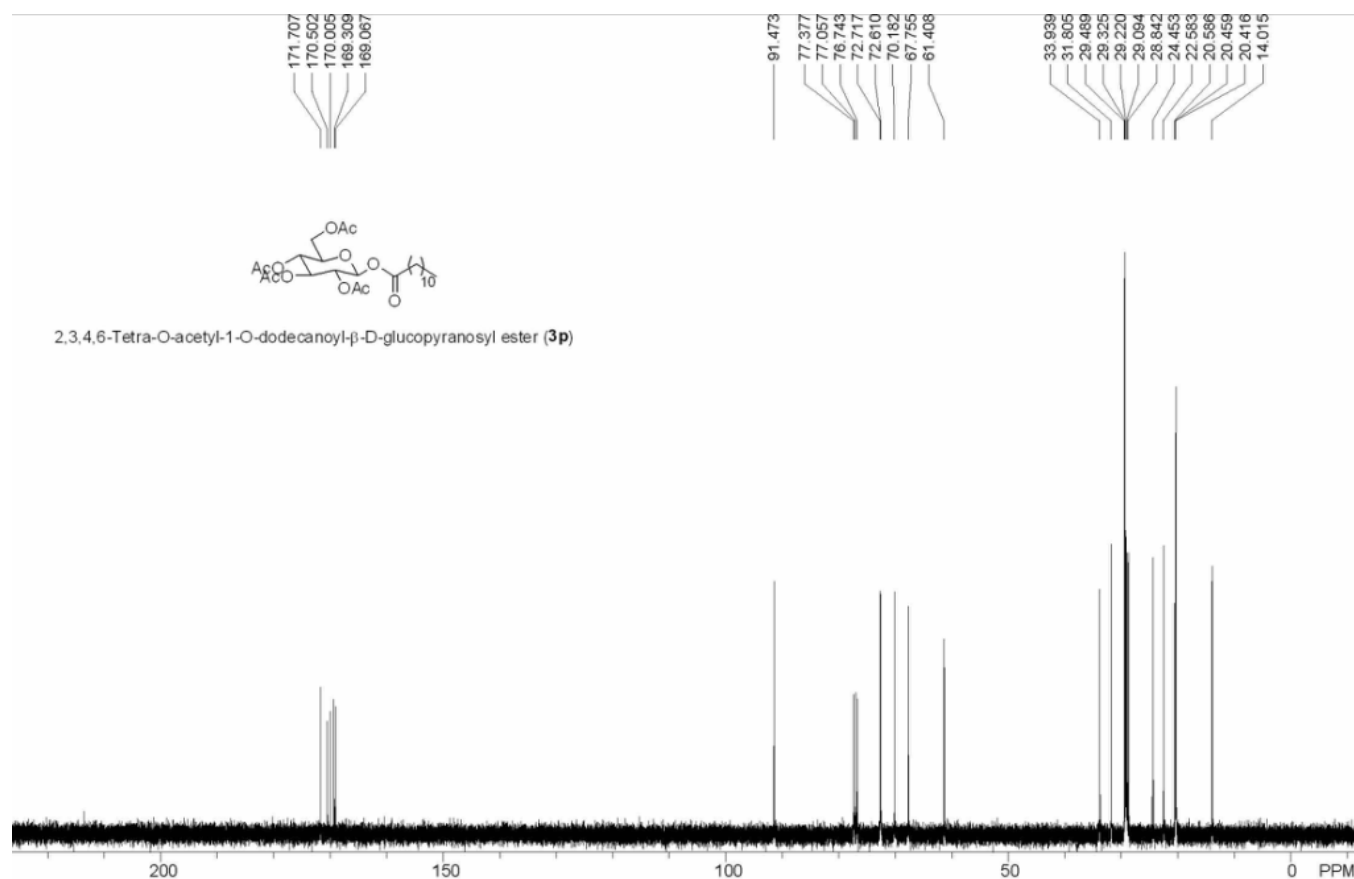

**Figure S32.** <sup>13</sup>C NMR spectrum of compound **3p**

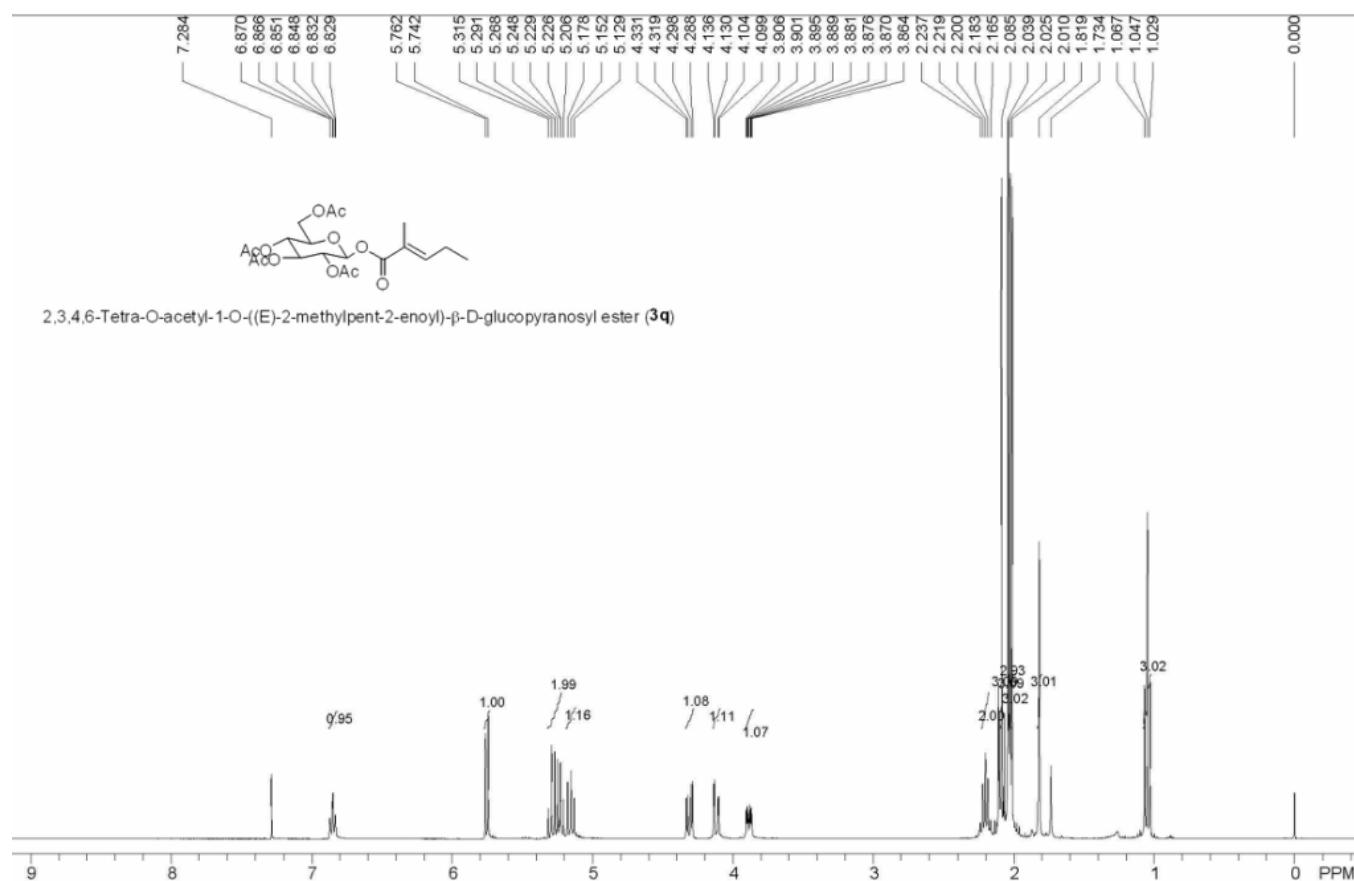

**Figure S33.** <sup>1</sup>H NMR spectrum of compound **3q**

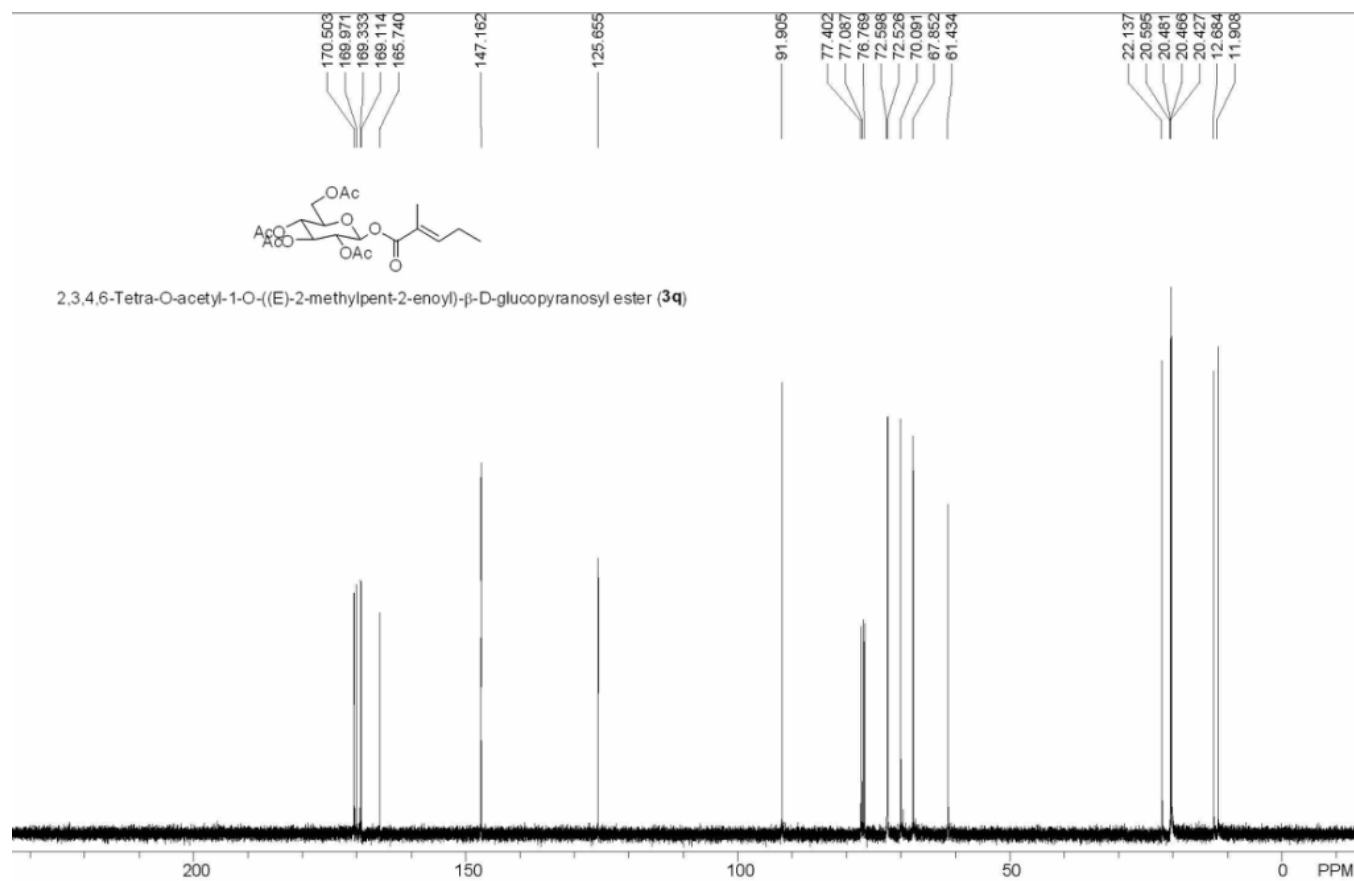

**Figure S34.** <sup>13</sup>C NMR spectrum of compound **3q**

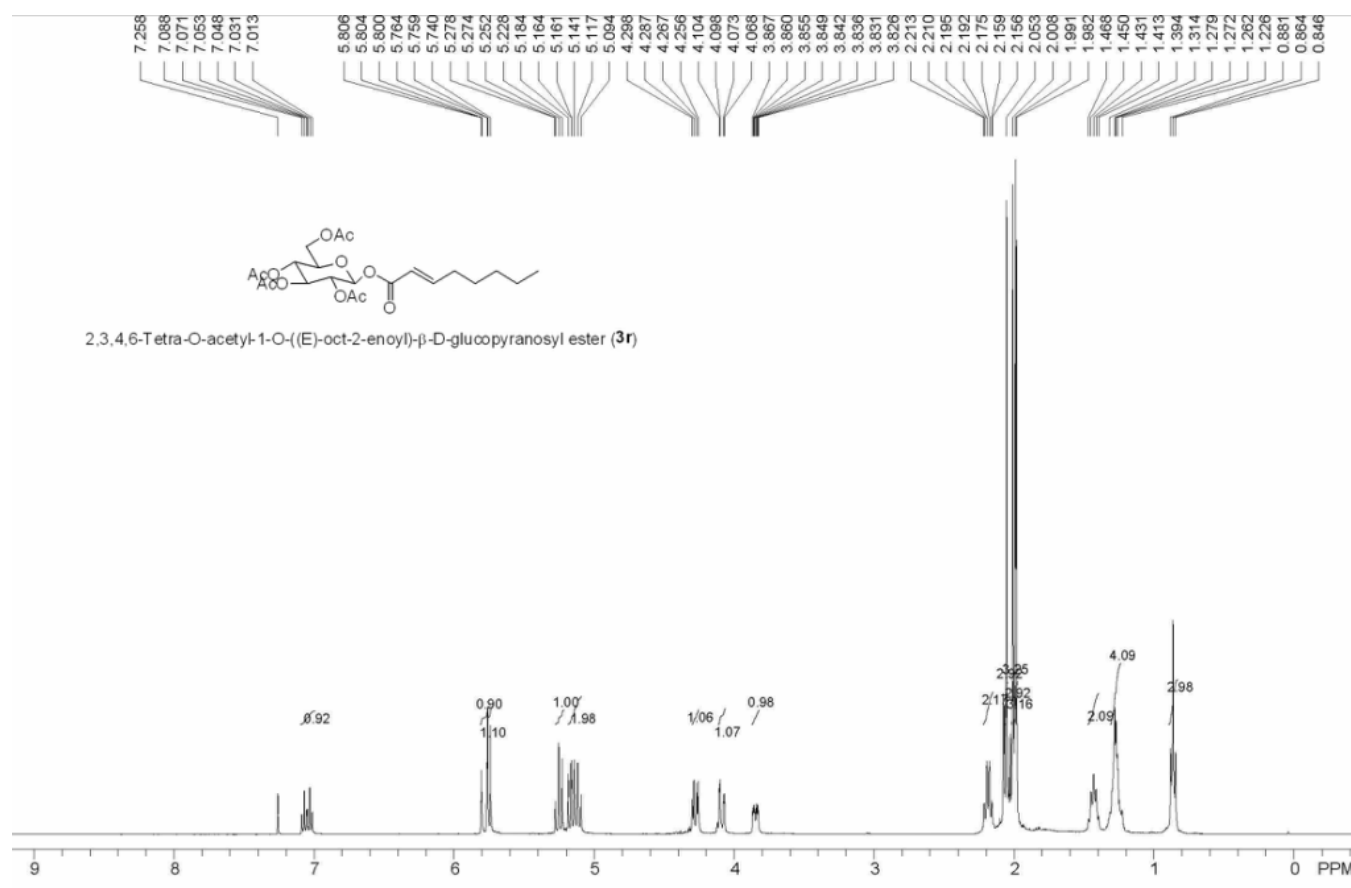

**Figure S35.** <sup>1</sup>H NMR spectrum of compound **3r**

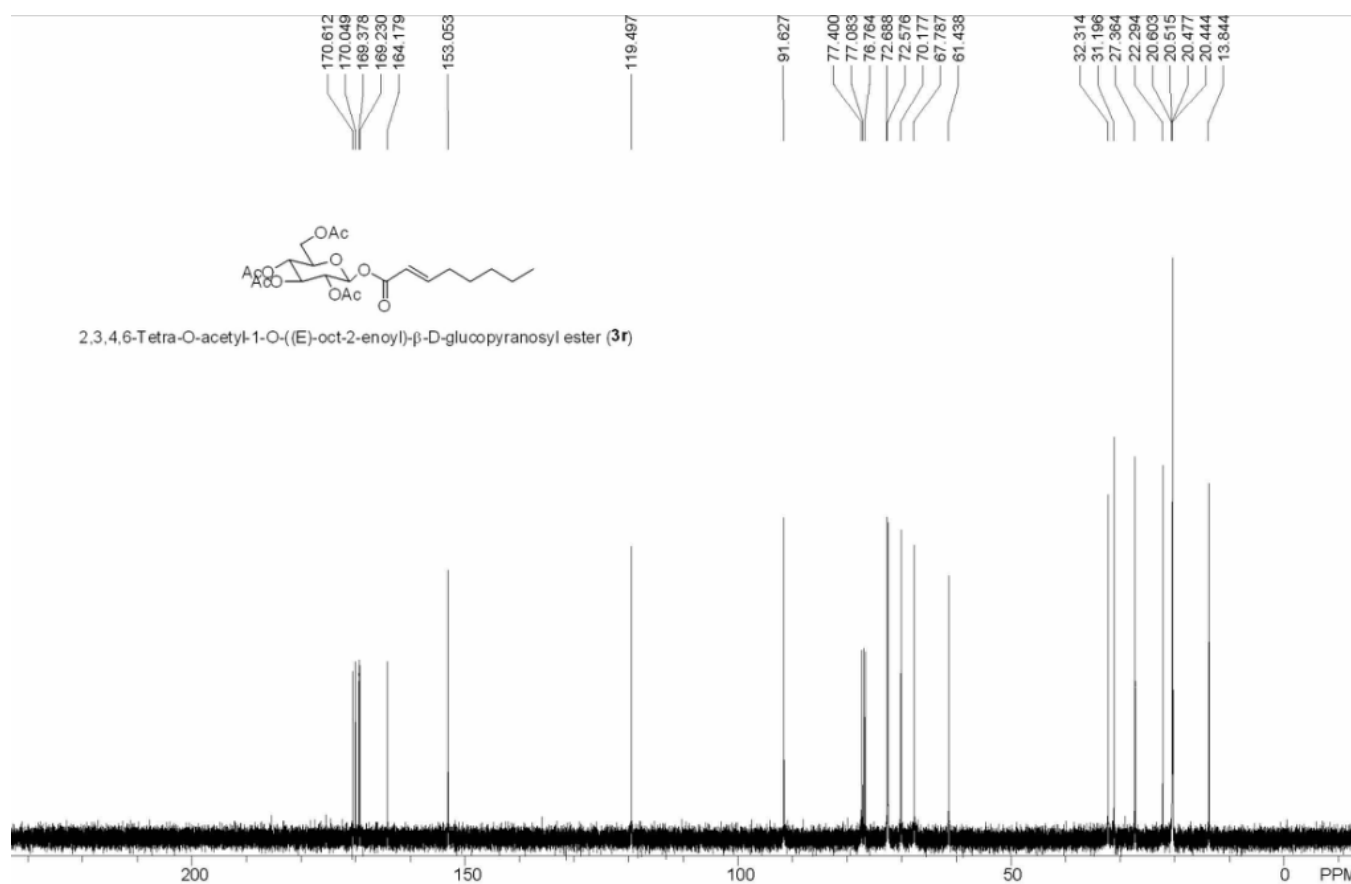

**Figure S36.** <sup>13</sup>C NMR spectrum of compound **3r**

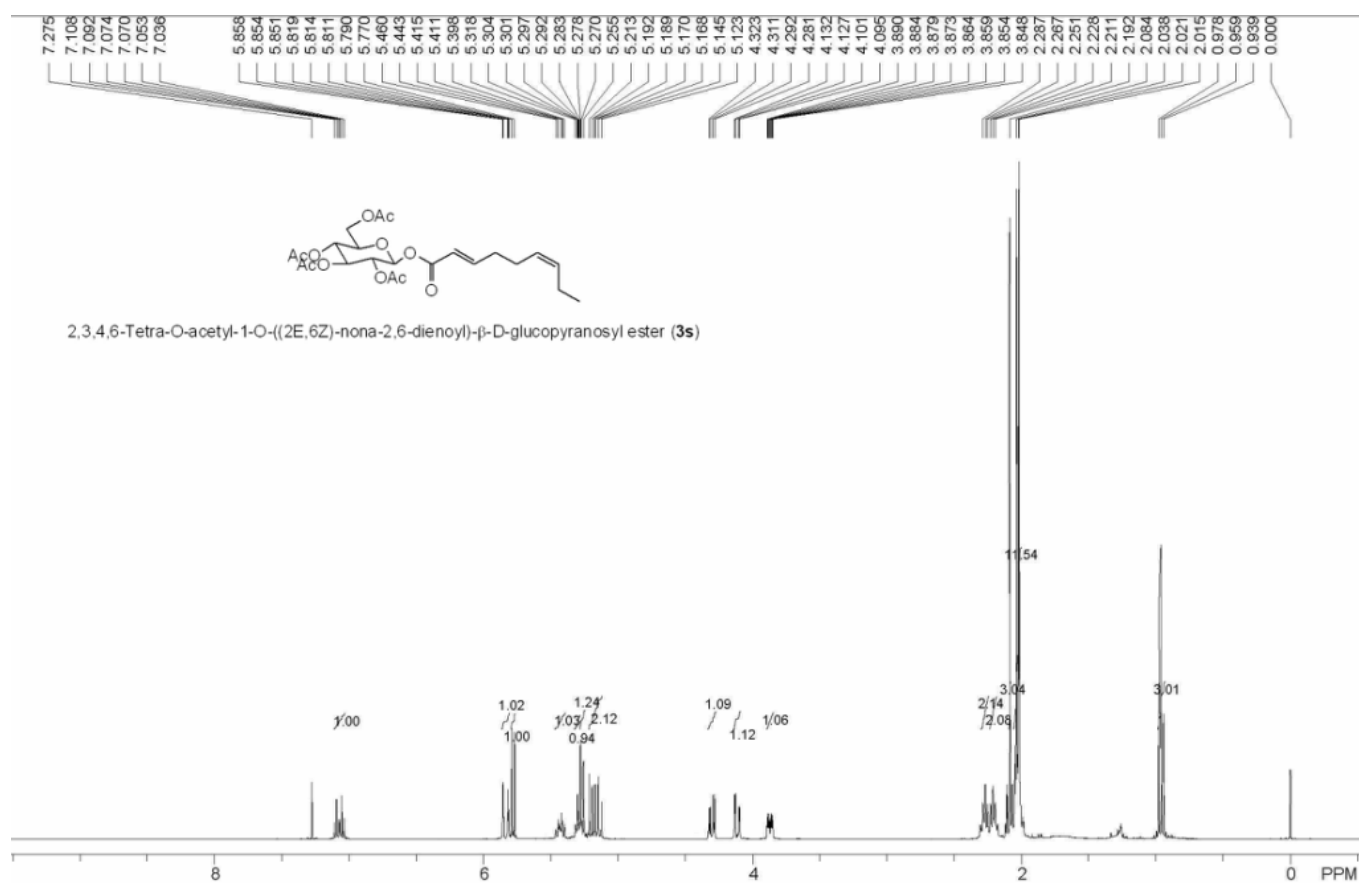

**Figure S37.**  $^1\text{H}$  NMR spectrum of compound **3s**

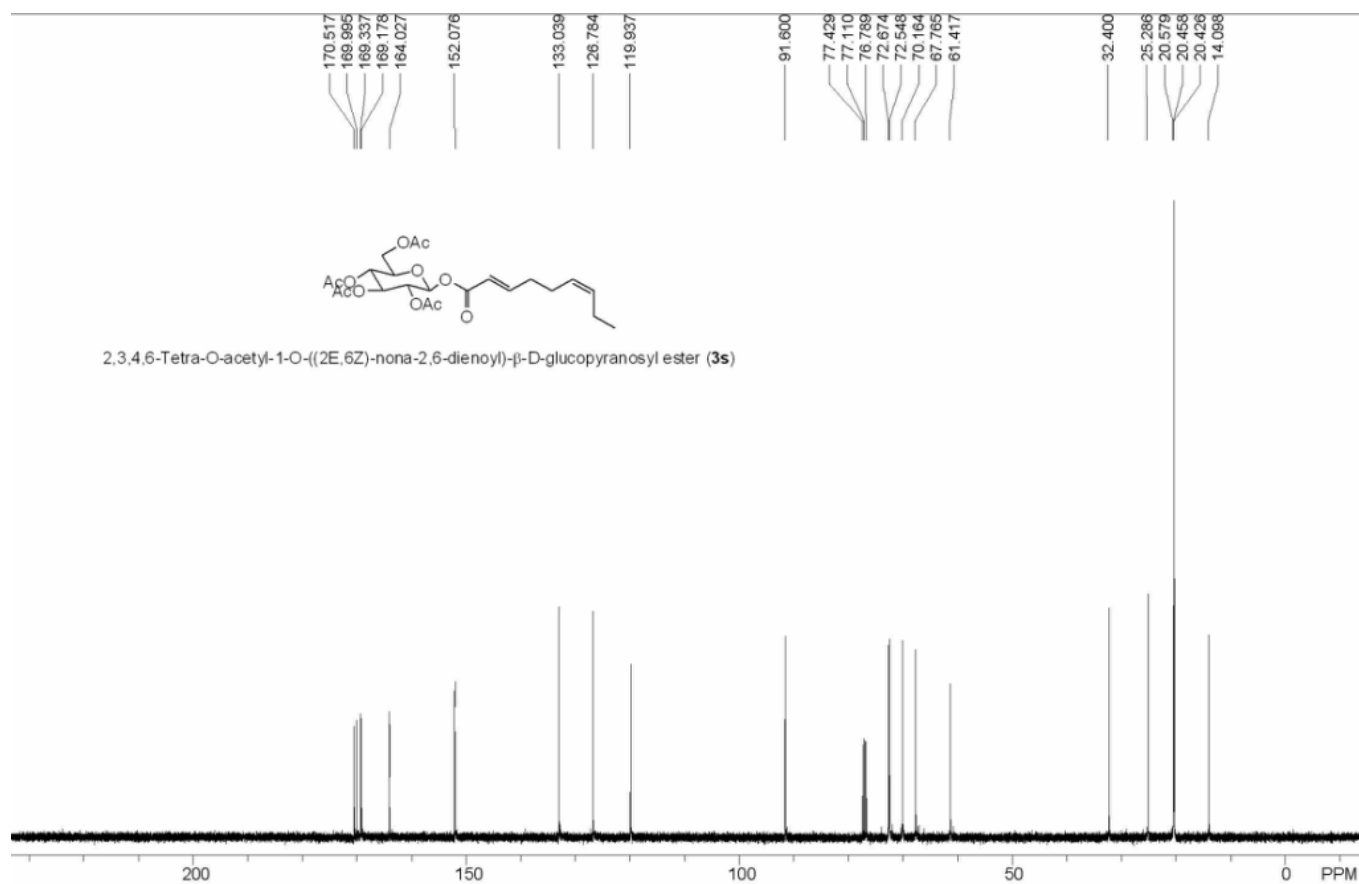

**Figure S38.**  $^{13}\text{C}$  NMR spectrum of compound **3s**

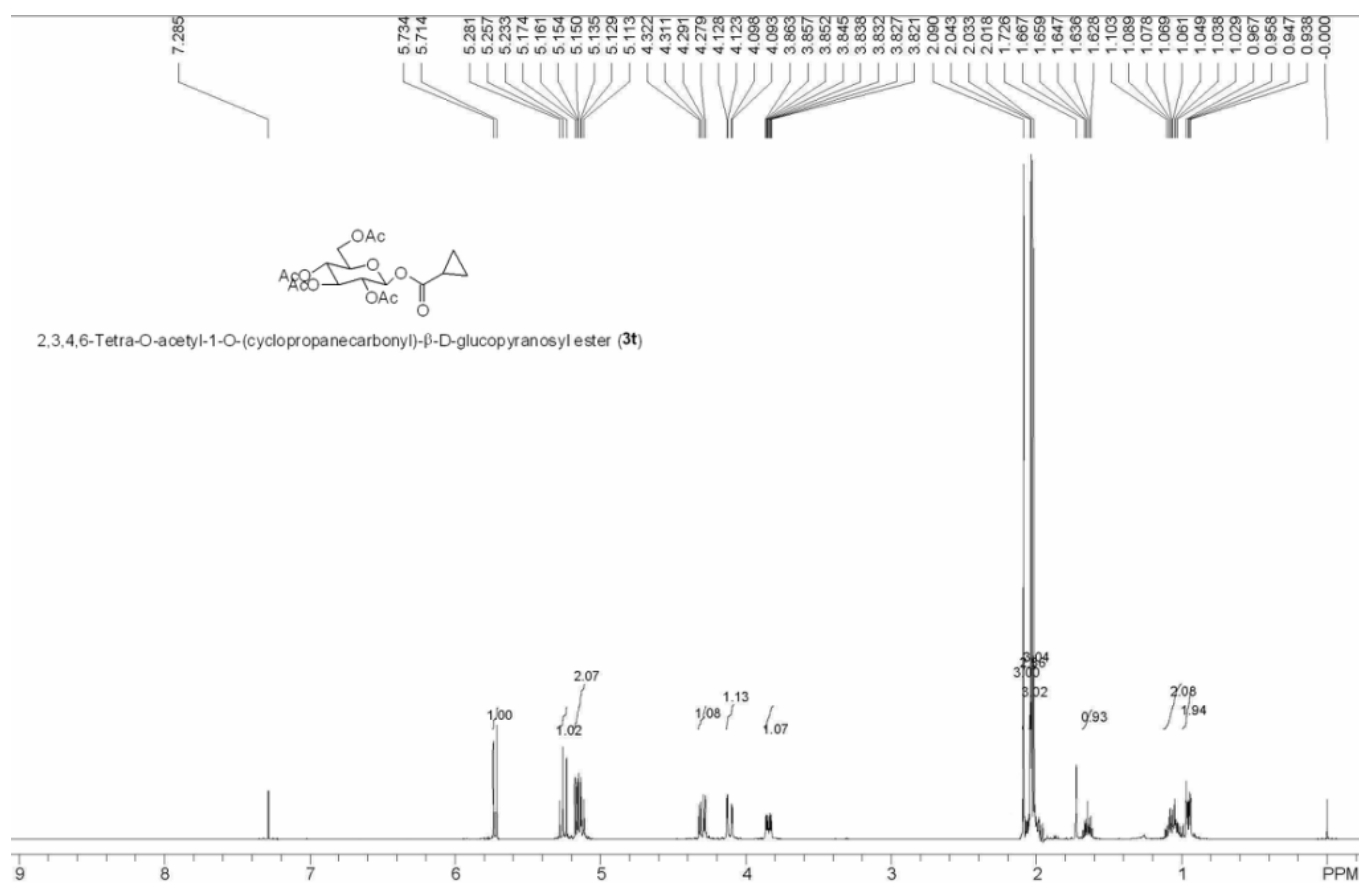

**Figure S39.** <sup>1</sup>H NMR spectrum of compound **3t**

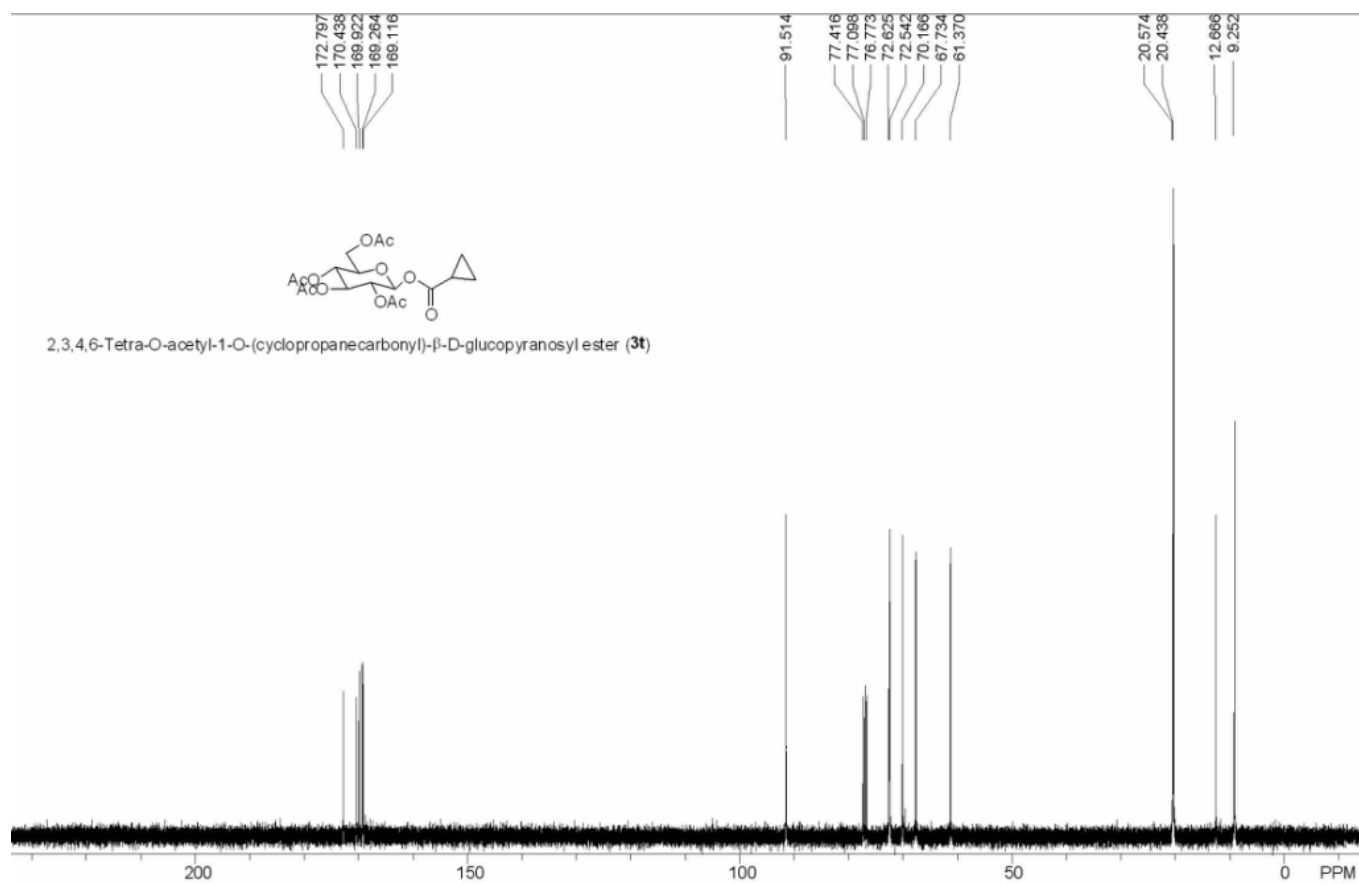

**Figure S40.** <sup>13</sup>C NMR spectrum of compound **3t**

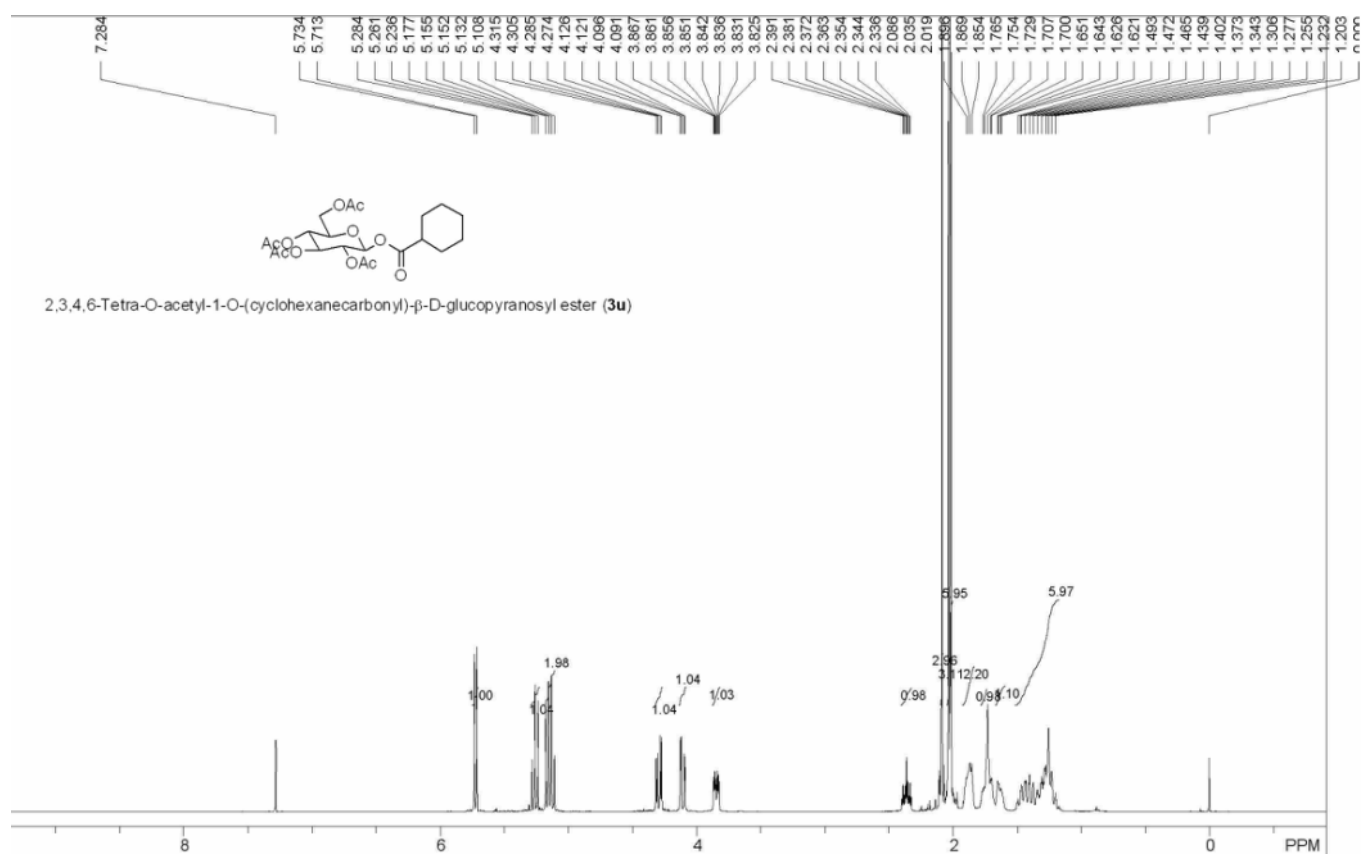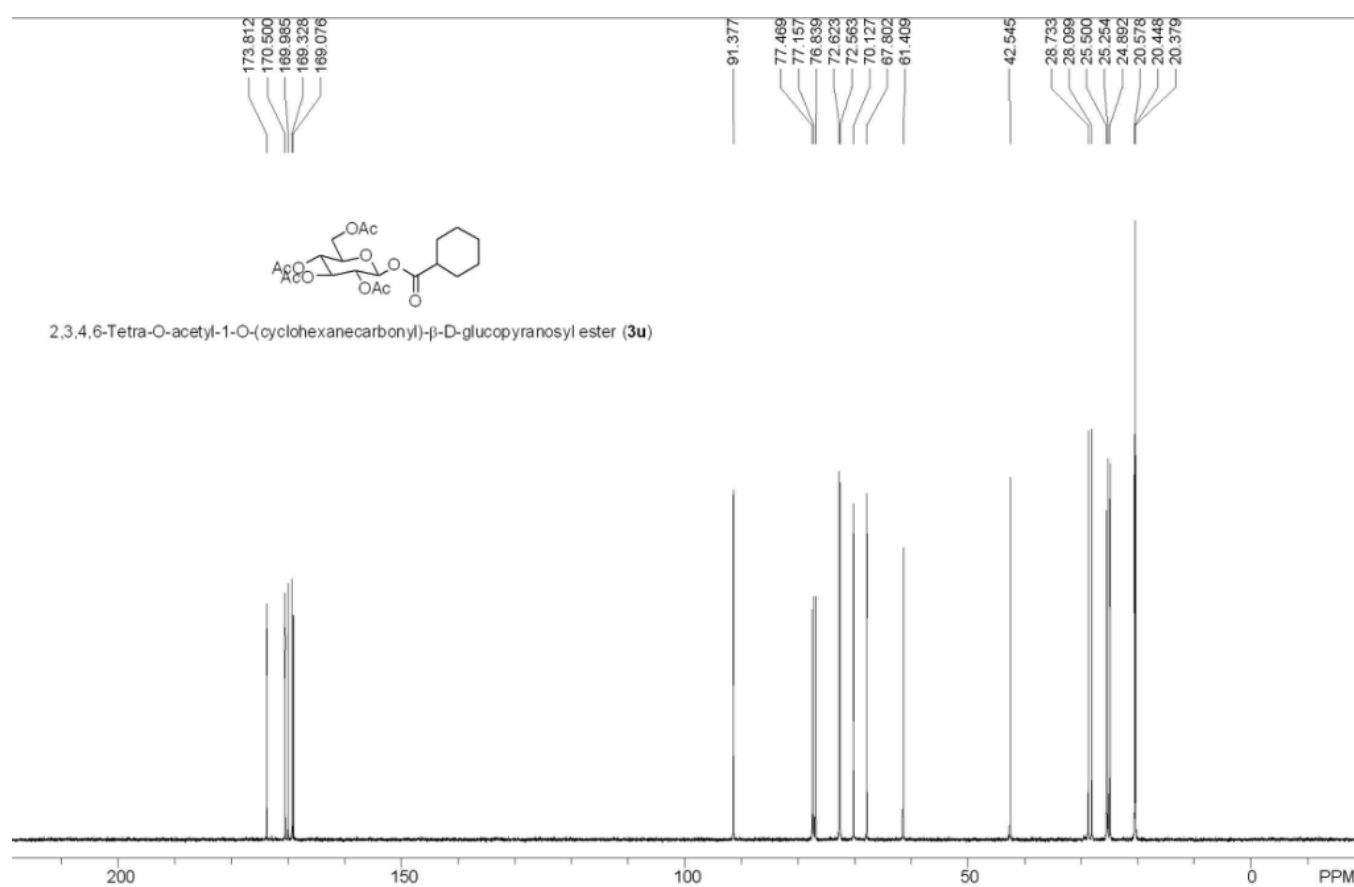

Supplement: Supplementary file 1 [file supplementary]
